# Supplementary material for: Efficient C-2 arylation of azoles via [κ 2 N] Pd( ii )-triazolyl-pyridine complexes enabled by silver in HFIP
Source: Royal Society of Chemistry journal article supplement (doi:10.1039/d5cy01409c), 2025-12-03
Supplement: d5cy01409c1.pdf [file d5cy01409c1.pdf]

## Supporting Information

### **Efficient C-2 Arylation of Azoles *via* [ $\kappa^2$ N] N-bound Triazolylpyridine Pd-Complexes Enabled by Silver in HFIP**

Puneet Singh Gahlaut Bhawana Shekhawat, Partha Mondal and Barun Jana\*

Organometallic and Supramolecular Chemistry Laboratory, Department of Chemistry, Malaviya National Institute of Technology Jaipur, JLN Marg, Jhalna Gram, Malviya Nagar, Jaipur, Rajasthan, 302017.

Fax: 91-141-2529029; Tel: 91-141-2713319 (MNIT-J)

**E-mail:** [barun.chy@mnit.ac.in](mailto:barun.chy@mnit.ac.in)

| <b>Contents</b>                                                                                                                                                                                                                                                                                                                            | <b>Page #</b> |
|--------------------------------------------------------------------------------------------------------------------------------------------------------------------------------------------------------------------------------------------------------------------------------------------------------------------------------------------|---------------|
| 1. Experimental section                                                                                                                                                                                                                                                                                                                    | S2            |
| 2. General procedure for synthesis of ligands and their complexes                                                                                                                                                                                                                                                                          | S2-S4         |
| 3. X-ray structure determination                                                                                                                                                                                                                                                                                                           | S4            |
| 4. Structural data for <b>3a</b><br>4.1 Table S1 Crystal data and structure refinement for <b>3a</b><br>4.2 Table S2 Bond length and angles for <b>3a</b><br>4.3 Table S3 Atomic coordinates and Ueq [ $\text{\AA}^2$ ] for complex <b>3a</b><br>4.4 Table S4 Anisotropic displacement parameters ( $\text{\AA}^2$ ) for complex <b>3a</b> | S4-S13        |
| 5. Comparison table with other methodology                                                                                                                                                                                                                                                                                                 | S14           |
| 6. Spectral data for ligand and complexes                                                                                                                                                                                                                                                                                                  | S15-S21       |
| 7. Kinetics experiment                                                                                                                                                                                                                                                                                                                     | S21-S23       |
| 8. Mercury drop experiment                                                                                                                                                                                                                                                                                                                 | S23           |
| 9. General procedure for C-2 arylated of azoles                                                                                                                                                                                                                                                                                            | S23-S24       |
| 10. Characterization data for C-2 arylated of azoles                                                                                                                                                                                                                                                                                       | S24-S29       |
| 11. Application in C-arylation of bi-phenyl pyridine                                                                                                                                                                                                                                                                                       | S29           |
| 12. NMR-data for C-2 arylated products                                                                                                                                                                                                                                                                                                     | S29-S44       |
| 13. References                                                                                                                                                                                                                                                                                                                             | S45           |

## 1. Experimental Section

### General information

All of the laboratory glassware was oven-dried and then used for the general experimental procedures. The melting point of solid compound was recorded in an open capillary on a Sisco melting point instrument and thereafter presented uncorrected.  $^1\text{H}$  and  $^{13}\text{C}$  NMR spectra were recorded on a JEOL ECS-400 spectrometer at 400 MHz for  $^1\text{H}$  proton NMR and 100 MHz for  $^{13}\text{C}$  proton NMR, and  $\text{CDCl}_3$  and  $\text{DMSO}-d_6$  were used as the solvents to prepare the samples. Both tetramethylsilane (TMS) ( $\delta$  0.00) and  $\text{CDCl}_3$  were applied as the internal standards while recording the  $^1\text{H}$  proton NMR ( $\delta$  7.246) and  $^{13}\text{C}$  ( $\delta$  77.0) NMR spectral data. The patterns of the chemical shifts in proton NMR are presented in parts per million. The peak splitting patterns are defined as singlet (s), broad singlet (brs), doublet (d), doublet of doublets (dd), triplet (t), and multiplet (m). All coupling constant ( $J$ ) values are presented in hertz. High-resolution electron impact mass spectra (HR-EIMS) were analyzed on a Xevo G2-Q-ToF instrument (Agilent) that was compatible with ACQUITY UPLC and nano ACQUITY UPLC systems. The mass spectra were also recorded on a Agilent Q-ToF-Micro Micromass instrument. Column chromatography was performed using normal (particle size, 100–200 mesh) and flash (particle size, 230–400 mesh) silica gels, which were obtained from Qualigens, Spectrochem, and Rankem. TLC plates coated with silica gel (Kiesel 60-F254, Merck) were used to track the progress of the chemical reactions. The visualizing agent that was utilized for TLC was UV light. To dry and concentrate all of the solvents, a D-LAB Rotavapor RE-100S was used. All of the supplied solvents such as MeOH, EtOAc, Hexane and HFIP were of analytical grade, and they were used without any prior purification. The chemicals and reagents used for the chemical reactions were purchased from Sigma-Aldrich Chemical Co., TCI Pvt. Ltd., Merck, Spectrochem, etc., and used without any purification prior to use.

## 2. General procedure

### Synthesis of di(prop-2-yn-1-yl)phthalate [dpp] (1)

Phthalic acid (3 g, 1.80 mmol) and  $\text{K}_2\text{CO}_3$  (9.98 g, 7.22 mmol) were combined in a 100 mL round bottom flask and 5–7 mL of dry  $\text{CH}_3\text{CN}$  was added to the reaction mixture. The reaction mixture was refluxed for one hour and propargyl bromide (8.59 g, 7.22 mmol) was added to the solution. The reaction mixture was continued to reflux and the progress of the reaction was monitored by TLC at regular intervals. On completion of the reaction (4 hours), acetonitrile was removed under a low pressure and 50 mL of water was added to the dried reaction mixture. The targeted compound was extracted from the reaction mixture using  $\text{CHCl}_3$  and was dried over anhydrous  $\text{Na}_2\text{SO}_4$ . Evaporation of  $\text{CHCl}_3$  gave the crude product, which was later purified by column chromatography using 3% ethyl acetate in hexane. An analytically pure brown viscous liquid was obtained as the final product.<sup>1</sup>

### Synthesis of bis((1-(pyridin-2-ylmethyl)-1H-1,2,3-triazol-4-yl)methyl) phthalate [bpmtmp] (2a)

A 1:2 mixture of [dpp] (1) (0.242 g, 1.0 mmol) and 2-(azido methyl)pyridine (0.268 g, 2.0 mmol) in 5 mL of methanol was stirred at room temperature in the presence of 2 mol% Cu(OAc)<sub>2</sub>. The progress of the reaction was followed using TLC. In 10 hours, the reaction was completed as observed in TLC. Methanol was removed from the reaction mixture under reduced pressure and the formed compound was purified by column chromatography using chloroform to get an analytically pure pale yellow viscous liquid. Yield : 0.311 g (61%). <sup>1</sup>H NMR (400 MHz, DMSO-*d*<sub>6</sub>) δ 8.48-8.46 (m, 2H), 8.27 (s, 2H), 7.78-7.74 (m, 2H), 7.69 – 7.62 (m, 4H), 7.30 – 7.25 (m, 4H), 5.69 (s, 4H), 5.26 (s, 4H). <sup>13</sup>C NMR (101 MHz, DMSO-*d*<sub>6</sub>) δ 167.1, 155.4, 149.9, 141.9, 137.9, 132.4, 131.6, 129.4, 126.5, 123.8, 122.8, 59.1, 54.9. IR max  $\nu$  (cm<sup>-1</sup>): 3071 (w, N-N stretch.), 2958 (w, C<sub>sp</sub><sup>3</sup>-H stretch.), 1718 (s, C=O stretch.), 1589 (m, C=C<sub>sp</sub><sup>2</sup> stretch.), 1438 (m, C<sub>sp</sub><sup>3</sup>-H bend.), 1267 (s, C-N stretch.), 1119 (m, C-C<sub>sp</sub><sup>3</sup> stretch.), 755 (s, C=C<sub>sp</sub><sup>2</sup> bend.) HRMS (ES) *m/z* calcd for C<sub>26</sub>H<sub>22</sub>N<sub>8</sub>O<sub>4</sub>: 510.1764; found 510.7000.

#### **Synthesis of bis((1-(pyridin-2-yl)-1H-1,2,3-triazol-5yl)methyl)phthalate [bptmp] (2b)**

2-Azidopyridine (0.252 g, 2.1 mmol) and [dpp] (0.242 g, 1.0 mmol) were mixed in a 100 mL round bottom flask and the reaction mixture was charged under a nitrogen atmosphere. 5 mL of dry CHCl<sub>3</sub> was added to the reaction mixture to obtain a heterogeneous solution. The reaction mixture was allowed to stir for 10 minutes, and then CuBr (0.029 g, 0.2 mmol) and DIPEA (0.259 g, 2.0 mmol) were added to the reaction mixture under a nitrogen flow. Additionally, the reaction mixture was refluxed for 16 hours under a nitrogen atmosphere. The solvent was removed under reduced pressure and the formed compound was purified by column chromatography using 5% MeOH in CHCl<sub>3</sub> to get an analytically pure off-white solid.<sup>1</sup>

#### **Synthesis of [PdCl<sub>2</sub>(bpmtmp)] (3a)**

Solid [bpmtmp] (2a) (0.510 g, 1.0 mmol) was mixed with solid [PdCl<sub>2</sub>(CH<sub>3</sub>CN)<sub>2</sub>] (0.259 g, 1.0 mmol) in a 10 mL round bottom flask and 2 mL of dry CHCl<sub>3</sub> was added to the reaction mixture at reflux. In 30 minutes, the reaction mixture solution turned into a turbid pale-yellow solution. The reaction mixture was allowed to stir for additional 10 hours at reflux. On completion of the reaction, the yellowish solid was separated using Whatman's filter paper and was washed with chloroform to remove the excess ligand from the product. A pale-yellow solid was obtained as an analytically pure compound. Dichloromethane was allowed to diffuse into a saturated solution of complex 3a in dimethyl-sulfoxide. Single crystals suitable for X-ray diffraction were obtained within 10 days. Yield : 0.487 g (71%). Mp: 342-345 °C. <sup>1</sup>H NMR (400 MHz, DMSO-*d*<sub>6</sub>) δ 8.52 – 8.51 (m, 2H), 8.32 (s, 2H), 7.82-7.78 (m, 2H), 7.74 – 7.71 (m, 2H), 7.68 – 7.66 (m, 2H), 7.34 – 7.29 (m, 4H), 5.74 (s, 4H), 5.31 (s, 4H). <sup>13</sup>C NMR (101 MHz, DMSO-*d*<sub>6</sub>) δ 167.0, 154.2, 148.5, 142.0, 140.0, 132.4, 131.6, 129.4, 126.6, 124.6, 123.7, 59.0, 53.9. IR max  $\nu$ (cm<sup>-1</sup>): 3077 (w, N-N stretch.), 1719 (s, C=O stretch.), 1606 (m, C=C<sub>sp</sub><sup>2</sup> stretch.), 1442 (m, C<sub>sp</sub><sup>3</sup>-H bend.), 1273 (s, C-N stretch.), 1119 (m, C-C<sub>sp</sub><sup>3</sup> stretch.), 767 (s, C=C<sub>sp</sub><sup>2</sup> bend.) HR-MS (ESI) *m/z* calcd for C<sub>26</sub>H<sub>22</sub>Cl<sub>2</sub>N<sub>8</sub>O<sub>4</sub>Pd + H<sup>+</sup> [M+H]<sup>+</sup> 688.8413, found 688.6000. Anal. calcd for C<sub>26</sub>H<sub>22</sub>Cl<sub>2</sub>N<sub>8</sub>O<sub>4</sub>Pd: C, 45.40; H, 3.22; N, 16.29. Found: C, 44.98; H, 3.10; N, 15.92.

#### **Synthesis of [PdCl<sub>2</sub>(bptmp)] (3b)**

Solid [bptmp] (2b) (0.482 g, 1.0 mmol) was mixed with solid [PdCl<sub>2</sub>(CH<sub>3</sub>CN)<sub>2</sub>] (0.259 g, 1.0 mmol) in a 10 mL round bottom flask and 2 mL of dry CHCl<sub>3</sub> was added to the reaction mixture at room temperature to get a clear red-wine solution. In 30 minutes, the clear red-wine solution turned into a turbid pale-yellow solution. The reaction mixture was allowed to stir for additional 10 hours at room temperature. On completion of the reaction, the yellowish solid was separated

using Whatman's filter paper and was washed with chloroform to remove the excess ligand from the product. A pale-yellow solid was obtained as an analytically pure compound. Dichloromethane was allowed to diffuse into a saturated solution of complex **3b** in dimethylsulfoxide. Single crystals suitable for X-ray diffraction were obtained in 1 day.<sup>1</sup>

### 3. X-ray structure determination

A crystal was mounted on the goniometer. Data for complex **3a** were collected from a single crystal in n/a hours at 296(2) K on a Bruker APEX-II CCD diffractometer. The diffractometer used MoK $\alpha$  radiation ( $\lambda = 0.71073$  Å). All data were integrated with, yielding 51325 reflections of which 7540 were independent and 85.4% were greater than  $2\sigma(F^2)$ . A multi-scan absorption correction using was applied. The structure was solved with SHELXT 2018/2 and refined by full-matrix least-squares methods against  $F^2$  using SHELXL-2019/2.<sup>2,3</sup> All non-hydrogen atoms were refined with anisotropic displacement parameters. All hydrogen atoms were refined isotropic on calculated positions using a riding model with their  $U_{\text{iso}}$  values constrained to 1.5 times the  $U_{\text{eq}}$  of their pivot atoms for terminal sp<sup>3</sup> carbon atoms and 1.2 times for all other carbon atoms. Crystallographic data for the structures reported in this paper have been deposited with the Cambridge Crystallographic Data Centre.<sup>4</sup>

CCDC : 2477385, contain the supplementary crystallographic data for this paper. These data can be obtained free of charge from The Cambridge Crystallographic Data Centre via [www.ccdc.cam.ac.uk/structures](http://www.ccdc.cam.ac.uk/structures). This report and the CIF file were generated using Final Cif of complex **3a** (<https://dkratzert.de/finalcif.html>).

### 4. Structural data for complex **3a**

**4.1 Table S1.** Crystal data and structure refinement for complex **3a**

|                                           |                                                                                  |
|-------------------------------------------|----------------------------------------------------------------------------------|
| CCDC number                               | 2477385                                                                          |
| Empirical formula                         | C <sub>28</sub> H <sub>23</sub> Cl <sub>2</sub> N <sub>9</sub> O <sub>4</sub> Pd |
| Formula weight                            | 726.85                                                                           |
| Temperature [K]                           | 296(2)                                                                           |
| Crystal system                            | monoclinic                                                                       |
| Space group (number)                      | $P2_1/c$ (14)                                                                    |
| $a$ [Å]                                   | 8.1522(2)                                                                        |
| $b$ [Å]                                   | 23.0108(6)                                                                       |
| $c$ [Å]                                   | 16.0988(4)                                                                       |
| $\alpha$ [°]                              | 90                                                                               |
| $\beta$ [°]                               | 91.1220(10)                                                                      |
| $\gamma$ [°]                              | 90                                                                               |
| Volume [Å <sup>3</sup> ]                  | 3019.37(13)                                                                      |
| $Z$                                       | 4                                                                                |
| $\rho_{\text{calc}}$ [gcm <sup>-3</sup> ] | 1.599                                                                            |
| $\mu$ [mm <sup>-1</sup> ]                 | 0.842                                                                            |
| $F(000)$                                  | 1464                                                                             |

|                                           |                                                                  |
|-------------------------------------------|------------------------------------------------------------------|
| Crystal size [mm <sup>3</sup> ]           | 0.22×0.08×0.08                                                   |
| Crystal colour                            | brown                                                            |
| Crystal shape                             | needle                                                           |
| Radiation                                 | MoK <sub>α</sub> (λ=0.71073 Å)                                   |
| 2θ range [°]                              | 4.35 to 56.72 (0.75 Å)                                           |
| Index ranges                              | −10 ≤ h ≤ 10<br>−30 ≤ k ≤ 30<br>−19 ≤ l ≤ 21                     |
| Reflections collected                     | 51325                                                            |
| Independent reflections                   | 7540<br>$R_{\text{int}} = 0.0538$<br>$R_{\text{sigma}} = 0.0354$ |
| Completeness to θ = 25.242°               | 99.9                                                             |
| Data / Restraints / Parameters            | 7540 / 552 / 516                                                 |
| Goodness-of-fit on $F^2$                  | 1.074                                                            |
| Final $R$ indexes [ $I \geq 2\sigma(I)$ ] | $R_1 = 0.0398$<br>$wR_2 = 0.0887$                                |
| Final $R$ indexes [all data]              | $R_1 = 0.0498$<br>$wR_2 = 0.0932$                                |
| Largest peak/hole [eÅ <sup>−3</sup> ]     | 0.95/−0.80                                                       |

**4.2 Table S2.** Bond lengths and angles (Å) for complex **3a**

| Atom–Atom | Length [Å] |
|-----------|------------|
| Pd1–N4    | 2.007(2)   |
| Pd1–N3    | 2.022(2)   |
| Pd1–Cl1   | 2.2857(8)  |
| Pd1–Cl2   | 2.2882(8)  |
| O1–C13    | 1.348(3)   |
| O1–C12    | 1.453(3)   |
| O2–C28    | 1.348(3)   |
| O2–C27    | 1.457(3)   |
| O3–C28    | 1.197(3)   |
| O4–C13    | 1.199(4)   |
| N1–N2     | 1.342(3)   |

|         |           |
|---------|-----------|
| N1–C9   | 1.350(4)  |
| N1–C6   | 1.427(12) |
| N1–C6'  | 1.532(12) |
| N2–N3   | 1.310(3)  |
| N3–C8   | 1.361(3)  |
| N4–N5   | 1.321(3)  |
| N4–C11  | 1.360(3)  |
| N5–N6   | 1.336(3)  |
| N6–C10  | 1.341(4)  |
| N6–C20  | 1.467(4)  |
| N7–C30  | 1.136(5)  |
| N9–C5   | 1.312(16) |
| N9–C1   | 1.341(15) |
| C1–C2   | 1.391(11) |
| C1–C6   | 1.516(12) |
| C2–C3   | 1.382(9)  |
| C3–C4   | 1.380(9)  |
| C4–C5   | 1.422(17) |
| N9'–C1' | 1.386(12) |
| N9'–C3' | 1.401(9)  |
| C1'–C2' | 1.30(2)   |
| C1'–C6' | 1.505(13) |
| C2'–C5' | 1.309(19) |
| C3'–C4' | 1.353(11) |
| C4'–C5' | 1.327(19) |
| C8–C9   | 1.370(4)  |
| C8–C12  | 1.484(4)  |
| C10–C11 | 1.371(4)  |
| C11–C27 | 1.488(4)  |

|                            |                  |
|----------------------------|------------------|
| C13–C14                    | 1.491(4)         |
| C14–C19                    | 1.391(4)         |
| C14–C15                    | 1.403(4)         |
| C15–C16                    | 1.387(4)         |
| C15–C28                    | 1.500(4)         |
| C16–C17                    | 1.392(4)         |
| C17–C18                    | 1.381(4)         |
| C18–C19                    | 1.387(4)         |
| C20–C21                    | 1.48(3)          |
| C20–C21'                   | 1.56(4)          |
| N8–C21                     | 1.32(4)          |
| N8–C23                     | 1.392(9)         |
| C21–C25                    | 1.46(3)          |
| C22–C25                    | 1.345(8)         |
| C22–C24                    | 1.547(19)        |
| C23–C24                    | 1.151(18)        |
| N8'–C21'                   | 1.20(5)          |
| N8'–C22'                   | 1.325(9)         |
| C21'–C25'                  | 1.44(5)          |
| C22'–C24'                  | 1.31(3)          |
| C23'–C25'                  | 1.400(10)        |
| C23'–C24'                  | 1.53(2)          |
| C29–C30                    | 1.445(5)         |
|                            |                  |
| <b>Atom–Atom–<br/>Atom</b> | <b>Angle [°]</b> |
| N4–Pd1–N3                  | 176.08(9)        |
| N4–Pd1–Cl1                 | 88.58(7)         |
| N3–Pd1–Cl1                 | 89.77(7)         |
| N4–Pd1–Cl2                 | 89.78(7)         |

|             |            |
|-------------|------------|
| N3–Pd1–Cl2  | 91.93(7)   |
| Cl1–Pd1–Cl2 | 178.09(3)  |
| C13–O1–C12  | 115.1(2)   |
| C28–O2–C27  | 116.7(2)   |
| N2–N1–C9    | 111.9(2)   |
| N2–N1–C6    | 123.3(5)   |
| C9–N1–C6    | 124.7(5)   |
| N2–N1–C6'   | 116.6(5)   |
| C9–N1–C6'   | 130.2(5)   |
| N3–N2–N1    | 105.3(2)   |
| N2–N3–C8    | 111.2(2)   |
| N2–N3–Pd1   | 119.17(18) |
| C8–N3–Pd1   | 129.54(19) |
| N5–N4–C11   | 111.2(2)   |
| N5–N4–Pd1   | 116.92(18) |
| C11–N4–Pd1  | 131.78(19) |
| N4–N5–N6    | 104.9(2)   |
| N5–N6–C10   | 112.3(2)   |
| N5–N6–C20   | 118.6(2)   |
| C10–N6–C20  | 129.0(2)   |
| C5–N9–C1    | 118.9(10)  |
| N9–C1–C2    | 122.2(8)   |
| N9–C1–C6    | 116.6(8)   |
| C2–C1–C6    | 120.7(8)   |
| C3–C2–C1    | 119.3(6)   |
| C4–C3–C2    | 118.5(6)   |
| C3–C4–C5    | 118.6(8)   |
| N9–C5–C4    | 122.3(13)  |
| N1–C6–C1    | 109.1(8)   |



|             |           |
|-------------|-----------|
| C1'–N9'–C3' | 116.5(7)  |
| C2'–C1'–N9' | 121.0(9)  |
| C2'–C1'–C6' | 118.6(10) |
| N9'–C1'–C6' | 120.3(8)  |
| C1'–C2'–C5' | 120.2(13) |
| C4'–C3'–N9' | 120.6(7)  |
| C5'–C4'–C3' | 117.6(10) |
| C2'–C5'–C4' | 124.0(16) |
| C1'–C6'–N1  | 112.9(9)  |
| N3–C8–C9    | 106.7(2)  |
| N3–C8–C12   | 123.4(2)  |
| C9–C8–C12   | 129.9(3)  |
| N1–C9–C8    | 104.9(2)  |
| N6–C10–C11  | 105.4(2)  |
| N4–C11–C10  | 106.2(2)  |
| N4–C11–C27  | 124.1(2)  |
| C10–C11–C27 | 129.7(3)  |
| O1–C12–C8   | 107.9(2)  |
| O4–C13–O1   | 124.3(3)  |
| O4–C13–C14  | 123.3(3)  |
| O1–C13–C14  | 112.5(2)  |
| C19–C14–C15 | 119.8(3)  |
| C19–C14–C13 | 121.2(3)  |
| C15–C14–C13 | 118.8(3)  |
| C16–C15–C14 | 119.6(3)  |
| C16–C15–C28 | 119.2(2)  |
| C14–C15–C28 | 121.1(2)  |
| C15–C16–C17 | 119.8(3)  |
| C18–C17–C16 | 120.8(3)  |

|                |           |
|----------------|-----------|
| C17–C18–C19    | 119.6(3)  |
| C18–C19–C14    | 120.3(3)  |
| N6–C20–C21     | 113.6(15) |
| N6–C20–C21'    | 109.7(17) |
| C21–N8–C23     | 123.4(14) |
| N8–C21–C25     | 117(2)    |
| N8–C21–C20     | 125(2)    |
| C25–C21–C20    | 117(3)    |
| C25–C22–C24    | 117.6(9)  |
| C24–C23–N8     | 122.8(12) |
| C23–C24–C22    | 120.6(18) |
| C22–C25–C21    | 118.0(15) |
| C21'–N8'–C22'  | 117(2)    |
| N8'–C21'–C25'  | 128(3)    |
| N8'–C21'–C20   | 121(4)    |
| C25'–C21'–C20  | 111(3)    |
| C24'–C22'–N8'  | 129.0(13) |
| C25'–C23'–C24' | 117.8(11) |
| C22'–C24'–C23' | 112.1(17) |
| C23'–C25'–C21' | 113.5(17) |
| O2–C27–C11     | 106.8(2)  |
| O3–C28–O2      | 125.1(3)  |
| O3–C28–C15     | 125.9(3)  |
| O2–C28–C15     | 109.0(2)  |
| N7–C30–C29     | 179.1(4)  |

**4.3 Table S3.** Atomic coordinates and  $U_{eq}$  [ $\text{\AA}^2$ ] for complex **3a**

| Atom | <i>x</i>   | <i>y</i>   | <i>z</i>   | $U_{eq}$   |
|------|------------|------------|------------|------------|
| Pd1  | 0.23108(2) | 0.62107(2) | 0.44552(2) | 0.01227(6) |

|      |             |             |             |             |
|------|-------------|-------------|-------------|-------------|
| Cl1  | 0.34725(9)  | 0.62809(5)  | 0.31784(5)  | 0.0339(2)   |
| Cl2  | 0.12196(9)  | 0.61577(4)  | 0.57517(5)  | 0.02676(17) |
| O1   | −0.0177(2)  | 0.74513(9)  | 0.40605(13) | 0.0202(4)   |
| O2   | 0.4161(2)   | 0.75022(8)  | 0.50092(12) | 0.0160(4)   |
| O3   | 0.5304(3)   | 0.83923(9)  | 0.48909(13) | 0.0209(4)   |
| O4   | 0.2157(3)   | 0.78941(9)  | 0.36824(13) | 0.0246(5)   |
| N1   | −0.2084(3)  | 0.57217(11) | 0.34729(15) | 0.0174(5)   |
| N2   | −0.0705(3)  | 0.56430(11) | 0.39282(16) | 0.0191(5)   |
| N3   | 0.0071(3)   | 0.61411(10) | 0.39019(15) | 0.0148(5)   |
| N4   | 0.4573(3)   | 0.62277(10) | 0.49684(14) | 0.0146(4)   |
| N5   | 0.5092(3)   | 0.57476(10) | 0.53386(15) | 0.0166(5)   |
| N6   | 0.6635(3)   | 0.58624(11) | 0.55802(15) | 0.0167(5)   |
| N7   | 0.6483(5)   | 0.77294(18) | 0.6876(2)   | 0.0537(10)  |
| N9   | −0.3613(18) | 0.5469(5)   | 0.1895(8)   | 0.0110(17)  |
| C1   | −0.3358(10) | 0.5070(4)   | 0.2492(6)   | 0.0163(15)  |
| C2   | −0.3314(8)  | 0.4478(2)   | 0.2322(4)   | 0.0230(12)  |
| H2   | −0.321971   | 0.420976    | 0.275280    | 0.028       |
| C3   | −0.3411(9)  | 0.4292(3)   | 0.1506(4)   | 0.0298(13)  |
| H3   | −0.337243   | 0.389826    | 0.137776    | 0.036       |
| C4   | −0.3565(10) | 0.4704(3)   | 0.0887(4)   | 0.0261(13)  |
| H4   | −0.359694   | 0.459460    | 0.033038    | 0.031       |
| C5   | −0.368(2)   | 0.5299(8)   | 0.1117(10)  | 0.019(2)    |
| H5   | −0.379622   | 0.557780    | 0.070175    | 0.023       |
| C6   | −0.3329(14) | 0.5289(5)   | 0.3380(7)   | 0.0150(18)  |
| H6A  | −0.438830   | 0.545354    | 0.351288    | 0.018       |
| H6B  | −0.310708   | 0.496947    | 0.375868    | 0.018       |
| N9'  | −0.2191(9)  | 0.4504(3)   | 0.2107(4)   | 0.0340(13)  |
| C1'  | −0.2951(12) | 0.5016(5)   | 0.2340(6)   | 0.0153(16)  |
| C2'  | −0.351(3)   | 0.5383(7)   | 0.1784(11)  | 0.015(2)    |
| H2'  | −0.392236   | 0.574006    | 0.194999    | 0.019       |
| C3'  | −0.2128(10) | 0.4394(3)   | 0.1253(4)   | 0.0293(14)  |
| H3'  | −0.161708   | 0.405843    | 0.106464    | 0.035       |
| C4'  | −0.2804(11) | 0.4770(3)   | 0.0698(5)   | 0.0259(14)  |
| H4'  | −0.279575   | 0.469501    | 0.013092    | 0.031       |
| C5'  | −0.348(2)   | 0.5250(9)   | 0.0994(10)  | 0.020(2)    |
| H5'  | −0.396233   | 0.550764    | 0.061767    | 0.024       |
| C6'  | −0.3065(15) | 0.5175(5)   | 0.3245(8)   | 0.0131(19)  |
| H6'A | −0.266367   | 0.485252    | 0.357956    | 0.016       |
| H6'B | −0.420775   | 0.523675    | 0.337671    | 0.016       |
| C8   | −0.0786(3)  | 0.65379(12) | 0.34412(17) | 0.0136(5)   |
| C9   | −0.2189(3)  | 0.62664(12) | 0.31643(17) | 0.0156(5)   |
| H9   | −0.302951   | 0.642292    | 0.283567    | 0.019       |
| C10  | 0.7088(3)   | 0.64051(13) | 0.53871(17) | 0.0164(5)   |
| H10  | 0.809235    | 0.658190    | 0.550353    | 0.020       |
| C11  | 0.5757(3)   | 0.66443(12) | 0.49817(16) | 0.0140(5)   |
| C12  | −0.0187(4)  | 0.71352(12) | 0.32790(18) | 0.0187(6)   |
| H12A | 0.091100    | 0.712162    | 0.305817    | 0.022       |
| H12B | −0.090193   | 0.732722    | 0.287608    | 0.022       |
| C13  | 0.1108(4)   | 0.78122(12) | 0.41810(18) | 0.0173(6)   |
| C14  | 0.1063(3)   | 0.81144(12) | 0.49996(18) | 0.0158(5)   |

|      |            |             |             |            |
|------|------------|-------------|-------------|------------|
| C15  | 0.2548(3)  | 0.82885(11) | 0.53785(17) | 0.0138(5)  |
| C16  | 0.2524(4)  | 0.86266(13) | 0.60917(18) | 0.0188(6)  |
| H16  | 0.350302   | 0.875008    | 0.634024    | 0.023      |
| C17  | 0.1031(4)  | 0.87806(14) | 0.64340(19) | 0.0222(6)  |
| H17  | 0.101888   | 0.900603    | 0.691330    | 0.027      |
| C18  | −0.0434(4) | 0.86027(13) | 0.60708(19) | 0.0217(6)  |
| H18  | −0.142505  | 0.870538    | 0.630655    | 0.026      |
| C19  | −0.0418(4) | 0.82700(13) | 0.5352(2)   | 0.0213(6)  |
| H19  | −0.140167  | 0.815041    | 0.510542    | 0.026      |
| C20  | 0.7549(4)  | 0.54190(13) | 0.60525(19) | 0.0204(6)  |
| H20A | 0.864853   | 0.539166    | 0.583671    | 0.031      |
| H20B | 0.701907   | 0.504566    | 0.596763    | 0.031      |
| N8   | 0.7741(8)  | 0.5140(3)   | 0.7541(4)   | 0.0363(12) |
| C21  | 0.766(6)   | 0.5539(14)  | 0.695(2)    | 0.020(2)   |
| C22  | 0.7522(9)  | 0.6258(3)   | 0.8032(4)   | 0.0307(13) |
| H22  | 0.743669   | 0.663606    | 0.822884    | 0.037      |
| C23  | 0.7808(10) | 0.5270(3)   | 0.8385(4)   | 0.0328(13) |
| H23  | 0.793197   | 0.496704    | 0.876292    | 0.039      |
| C24  | 0.772(3)   | 0.5738(6)   | 0.8635(14)  | 0.030(2)   |
| H24  | 0.775863   | 0.580307    | 0.920519    | 0.036      |
| C25  | 0.7482(7)  | 0.6143(2)   | 0.7213(3)   | 0.0193(11) |
| H25  | 0.734330   | 0.643882    | 0.682472    | 0.023      |
| N8'  | 0.6337(7)  | 0.5805(3)   | 0.7287(3)   | 0.0264(12) |
| C21' | 0.750(6)   | 0.5564(16)  | 0.700(2)    | 0.021(2)   |
| C22' | 0.6392(10) | 0.5911(3)   | 0.8096(4)   | 0.0310(14) |
| H22' | 0.543122   | 0.605716    | 0.831752    | 0.037      |
| C23' | 0.8924(10) | 0.5434(4)   | 0.8292(4)   | 0.0319(14) |
| H23' | 0.971183   | 0.526805    | 0.864421    | 0.038      |
| C24' | 0.761(3)   | 0.5840(7)   | 0.8626(16)  | 0.029(2)   |
| H24' | 0.767448   | 0.601587    | 0.914611    | 0.035      |
| C25' | 0.8902(9)  | 0.5319(3)   | 0.7438(4)   | 0.0255(13) |
| H25' | 0.971232   | 0.510547    | 0.717648    | 0.031      |
| C27  | 0.5554(3)  | 0.72319(12) | 0.46074(19) | 0.0174(6)  |
| C28  | 0.4164(3)  | 0.80873(12) | 0.50539(17) | 0.0152(5)  |
| C29  | 0.3976(5)  | 0.70466(17) | 0.6930(2)   | 0.0365(8)  |
| H29A | 0.343162   | 0.709404    | 0.744953    | 0.055      |
| H29B | 0.433710   | 0.665154    | 0.687710    | 0.055      |
| H29C | 0.322890   | 0.713895    | 0.648129    | 0.055      |
| C30  | 0.5375(5)  | 0.74309(16) | 0.6906(2)   | 0.0325(8)  |

**4.4 Table S4.** Anisotropic displacement parameters ( $\text{\AA}^2$ ) for complex **3a**. The anisotropic displacement factor exponent takes the form:

$$-2\pi^2[ h^2(a^*)^2U_{11} + k^2(b^*)^2U_{22} + \dots + 2hka^*b^*U_{12} ]$$

| Atom | $U_{11}$    | $U_{22}$    | $U_{33}$    | $U_{23}$   | $U_{13}$    | $U_{12}$    |
|------|-------------|-------------|-------------|------------|-------------|-------------|
| Pd1  | 0.00985(10) | 0.01361(10) | 0.01327(10) | 0.00015(8) | −0.00187(7) | −0.00003(8) |
| Cl1  | 0.0145(3)   | 0.0725(6)   | 0.0148(3)   | −0.0044(4) | 0.0002(3)   | −0.0004(4)  |
| Cl2  | 0.0135(3)   | 0.0496(5)   | 0.0171(3)   | 0.0066(3)  | −0.0008(3)  | −0.0048(3)  |
| O1   | 0.0160(10)  | 0.0196(10)  | 0.0250(11)  | −0.0097(8) | −0.0029(8)  | −0.0024(8)  |
| O2   | 0.0124(9)   | 0.0148(9)   | 0.0208(10)  | −0.0014(8) | 0.0042(8)   | 0.0001(7)   |

|      |            |            |            |             |             |             |
|------|------------|------------|------------|-------------|-------------|-------------|
| O3   | 0.0179(10) | 0.0197(10) | 0.0251(11) | −0.0029(9)  | 0.0025(9)   | −0.0062(8)  |
| O4   | 0.0329(12) | 0.0246(11) | 0.0162(10) | −0.0034(8)  | 0.0008(9)   | −0.0121(10) |
| N1   | 0.0151(11) | 0.0222(12) | 0.0146(12) | 0.0021(9)   | −0.0042(9)  | −0.0065(10) |
| N2   | 0.0192(12) | 0.0190(12) | 0.0188(12) | 0.0034(10)  | −0.0057(10) | −0.0040(10) |
| N3   | 0.0119(11) | 0.0163(11) | 0.0162(11) | −0.0020(9)  | −0.0014(9)  | −0.0002(9)  |
| N4   | 0.0110(10) | 0.0179(11) | 0.0150(11) | 0.0007(9)   | 0.0001(9)   | 0.0012(9)   |
| N5   | 0.0130(11) | 0.0201(12) | 0.0166(12) | 0.0010(9)   | −0.0014(9)  | 0.0037(9)   |
| N6   | 0.0117(11) | 0.0239(13) | 0.0146(11) | 0.0011(9)   | 0.0001(9)   | 0.0039(9)   |
| N7   | 0.049(2)   | 0.060(2)   | 0.051(2)   | −0.0077(19) | −0.0174(18) | −0.0188(19) |
| N9   | 0.017(2)   | 0.006(3)   | 0.010(3)   | −0.003(2)   | 0.003(2)    | 0.005(2)    |
| C1   | 0.019(3)   | 0.013(3)   | 0.017(3)   | −0.004(2)   | −0.002(2)   | −0.002(2)   |
| C2   | 0.028(3)   | 0.017(2)   | 0.024(3)   | −0.002(2)   | −0.004(2)   | 0.000(2)    |
| C3   | 0.041(3)   | 0.019(2)   | 0.029(3)   | −0.006(2)   | −0.012(2)   | 0.002(2)    |
| C4   | 0.033(3)   | 0.026(3)   | 0.019(3)   | −0.009(2)   | −0.004(2)   | 0.002(3)    |
| C5   | 0.023(3)   | 0.016(3)   | 0.020(4)   | −0.003(3)   | 0.004(3)    | 0.003(3)    |
| C6   | 0.019(4)   | 0.013(4)   | 0.013(4)   | −0.003(3)   | 0.001(3)    | −0.005(3)   |
| N9'  | 0.040(3)   | 0.028(3)   | 0.034(3)   | −0.003(2)   | −0.007(3)   | 0.001(2)    |
| C1'  | 0.020(3)   | 0.012(3)   | 0.013(3)   | −0.004(2)   | 0.000(3)    | −0.003(3)   |
| C2'  | 0.024(3)   | 0.009(4)   | 0.014(4)   | −0.004(3)   | 0.006(3)    | 0.003(3)    |
| C3'  | 0.042(3)   | 0.019(3)   | 0.027(3)   | −0.009(2)   | −0.004(3)   | 0.009(3)    |
| C4'  | 0.032(3)   | 0.025(3)   | 0.021(3)   | −0.007(2)   | 0.001(3)    | −0.003(3)   |
| C5'  | 0.028(4)   | 0.020(4)   | 0.012(4)   | −0.005(3)   | 0.000(3)    | 0.000(3)    |
| C6'  | 0.014(4)   | 0.010(4)   | 0.016(4)   | −0.004(3)   | 0.001(3)    | −0.004(3)   |
| C8   | 0.0112(12) | 0.0152(13) | 0.0143(13) | −0.0024(10) | 0.0000(10)  | 0.0013(10)  |
| C9   | 0.0139(13) | 0.0191(14) | 0.0137(13) | −0.0013(10) | −0.0002(10) | 0.0014(11)  |
| C10  | 0.0100(12) | 0.0239(14) | 0.0152(13) | −0.0017(11) | 0.0017(10)  | 0.0017(11)  |
| C11  | 0.0106(12) | 0.0202(13) | 0.0111(12) | −0.0028(10) | 0.0008(10)  | 0.0010(10)  |
| C12  | 0.0240(15) | 0.0166(13) | 0.0152(14) | −0.0019(11) | −0.0076(11) | −0.0019(11) |
| C13  | 0.0194(14) | 0.0112(12) | 0.0211(15) | −0.0012(10) | −0.0051(12) | 0.0007(10)  |
| C14  | 0.0184(14) | 0.0118(12) | 0.0170(13) | −0.0005(10) | −0.0021(11) | −0.0009(10) |
| C15  | 0.0160(13) | 0.0117(12) | 0.0137(13) | 0.0010(9)   | −0.0007(10) | −0.0012(10) |
| C16  | 0.0183(14) | 0.0215(14) | 0.0164(13) | −0.0020(11) | −0.0035(11) | −0.0014(11) |
| C17  | 0.0269(16) | 0.0240(15) | 0.0156(14) | −0.0038(12) | −0.0001(12) | 0.0053(13)  |
| C18  | 0.0195(14) | 0.0223(14) | 0.0236(15) | 0.0001(12)  | 0.0041(12)  | 0.0047(12)  |
| C19  | 0.0146(13) | 0.0186(14) | 0.0307(17) | −0.0046(12) | −0.0032(12) | 0.0021(11)  |
| C20  | 0.0167(14) | 0.0257(15) | 0.0188(14) | 0.0033(12)  | −0.0010(11) | 0.0063(12)  |
| N8   | 0.043(3)   | 0.036(3)   | 0.030(2)   | 0.001(2)    | −0.001(2)   | 0.006(2)    |
| C21  | 0.018(3)   | 0.024(4)   | 0.018(4)   | 0.001(3)    | 0.000(3)    | 0.004(3)    |
| C22  | 0.042(3)   | 0.026(3)   | 0.024(3)   | −0.004(2)   | −0.001(2)   | 0.004(2)    |
| C23  | 0.044(3)   | 0.031(3)   | 0.023(2)   | 0.006(2)    | −0.003(2)   | 0.007(2)    |
| C24  | 0.038(4)   | 0.034(4)   | 0.018(3)   | 0.002(4)    | −0.004(3)   | 0.005(4)    |
| C25  | 0.029(2)   | 0.015(2)   | 0.013(2)   | 0.0009(18)  | −0.001(2)   | 0.002(2)    |
| N8'  | 0.026(2)   | 0.037(3)   | 0.016(2)   | −0.004(2)   | 0.000(2)    | 0.011(2)    |
| C21' | 0.019(3)   | 0.027(4)   | 0.016(4)   | 0.002(3)    | 0.002(3)    | 0.003(4)    |
| C22' | 0.033(3)   | 0.037(3)   | 0.022(3)   | −0.003(2)   | 0.000(2)    | 0.005(3)    |
| C23' | 0.033(3)   | 0.041(3)   | 0.021(3)   | 0.000(2)    | −0.012(3)   | 0.011(3)    |
| C24' | 0.035(4)   | 0.031(4)   | 0.020(3)   | −0.004(4)   | −0.001(3)   | 0.008(4)    |
| C25' | 0.021(3)   | 0.035(3)   | 0.020(3)   | −0.001(2)   | 0.000(2)    | 0.011(2)    |
| C27  | 0.0118(12) | 0.0191(14) | 0.0214(14) | −0.0003(11) | 0.0050(11)  | 0.0031(10)  |
| C28  | 0.0163(13) | 0.0163(13) | 0.0128(13) | −0.0003(10) | −0.0020(10) | −0.0018(10) |
| C29  | 0.042(2)   | 0.041(2)   | 0.0272(18) | 0.0007(15)  | 0.0094(16)  | −0.0078(17) |
| C30  | 0.038(2)   | 0.038(2)   | 0.0214(17) | −0.0087(14) | −0.0055(14) | −0.0005(16) |

## 5. Comparison table with previous work

**Table S5:**

| Catalyst                                                                                                            | Reaction conditions                                                                                                                                                                                                                                         | References |
|---------------------------------------------------------------------------------------------------------------------|-------------------------------------------------------------------------------------------------------------------------------------------------------------------------------------------------------------------------------------------------------------|------------|
| Ni(OAc) <sub>2</sub><br>2,2'-bipyridine                                                                             | [catalyst: Ni(OAc) <sub>2</sub> (10 mol%), bipy (10 mol%), base: LiO <sup>t</sup> Bu, solvent: 1,4-dioxane, time: 36 h, 85 °C]                                                                                                                              | 5          |
| 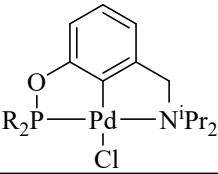                                   | [catalyst: 0.5 mol%, base: Cs <sub>2</sub> CO <sub>3</sub> , solvent: DMF, additive: CuI (5 mol%), time: 16 h, 120 °C]                                                                                                                                      | 6          |
| Pd(OAc) <sub>2</sub>                                                                                                | [catalyst: Pd(OAc) <sub>2</sub> (1.0 mol%), Ag <sub>2</sub> O (1.0 equiv.), base: NaOAc, solvent: HFIP, time: 12 h, N <sub>2</sub> atmosphere, rt]                                                                                                          | 7          |
| Pd <sub>2</sub> (dba) <sub>3</sub><br>Phen.H <sub>2</sub> O                                                         | [catalyst: Pd <sub>2</sub> (dba) <sub>3</sub> (2.5 mol%), Phen.H <sub>2</sub> O, PPh <sub>3</sub> base: K <sub>3</sub> PO <sub>4</sub> , solvent: DMF, time: 4 h, N <sub>2</sub> atmosphere, 100-140 °C ]                                                   | 8          |
| 2,4,6-tris(5-formyl-2-pyridinoxy)-1,3,5-triazine (TFPT) benzidine (BZ) co-valent organic frame-work (COF)/Pd        | [catalyst: TFPT-BZ COF/Pd (40 mg), base: K <sub>2</sub> CO <sub>3</sub> , solvent: 2-Me THF, time: 5-6 h, reflux]                                                                                                                                           | 9          |
| <br>(PCy <sub>2</sub> -Man-phos) | [catalyst: Pd(OAc) <sub>2</sub> (2.0 mol%), PCy <sub>2</sub> -Man-phos (8.0 mol%), base: LiO <sup>t</sup> Bu, solvent: THF, time: 24 h, 110 °C ]                                                                                                            | 10         |
|                                  | <ul style="list-style-type: none"> <li>• New Pd(II)-complex of N-bound triazolyl-pyridine ligand</li> <li>• Low catalyst loading (0.25 mol%)</li> <li>• No, phosphorus-based additive</li> <li>• Lower reaction time</li> <li>• Room temperature</li> </ul> | Our work   |

## 6. Spectral data for ligand and complexes

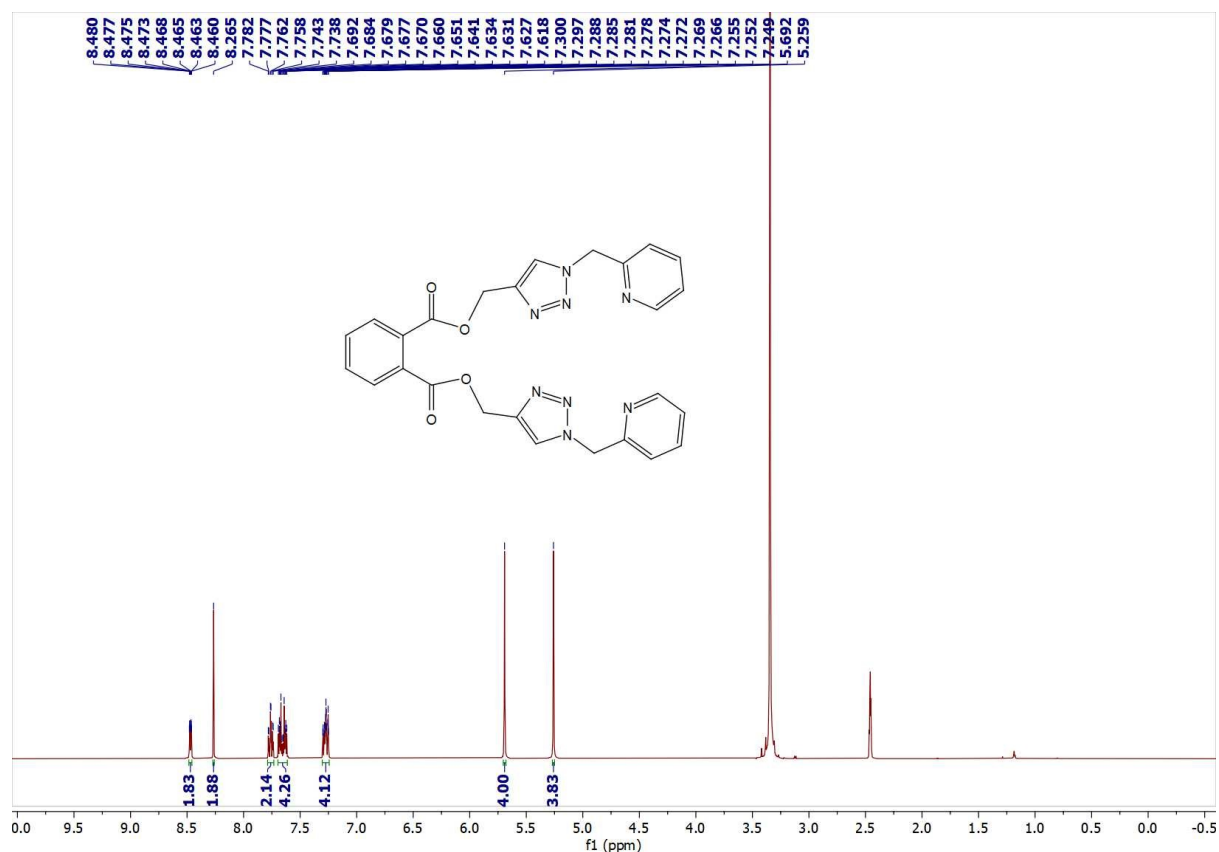

**Fig. S1 <sup>1</sup>H-NMR Spectrum of [bpmtmp] 2a**

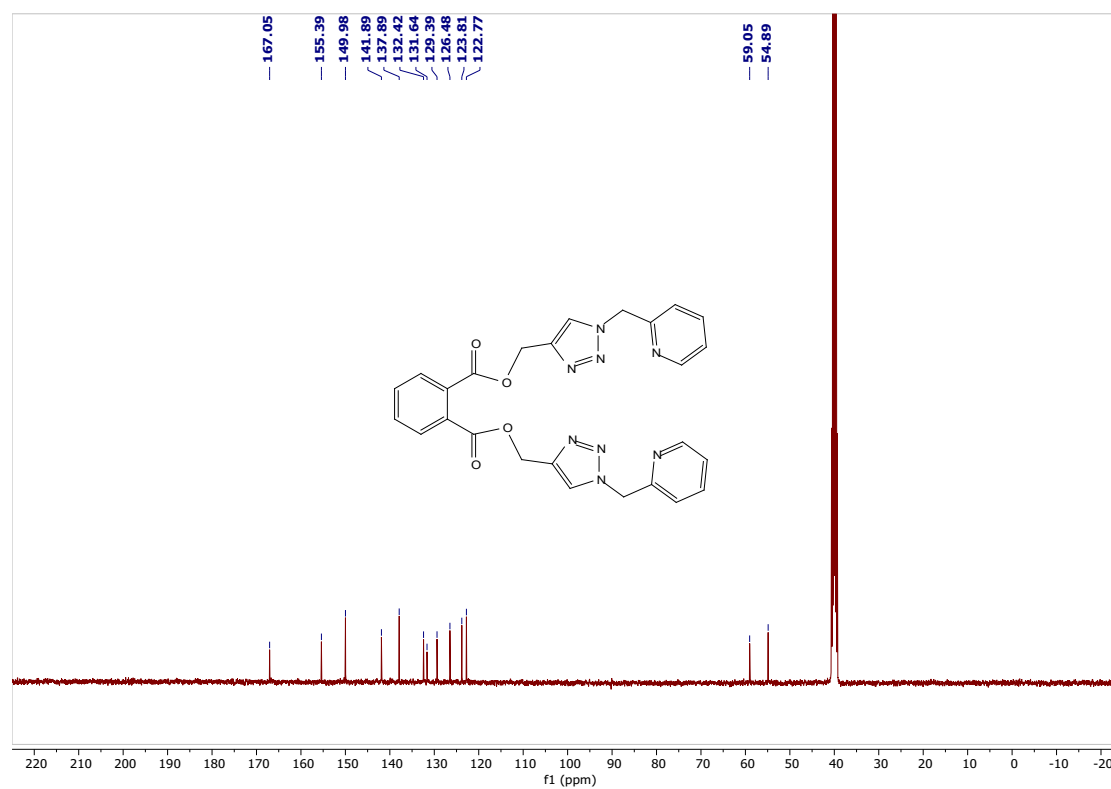

**Fig. S2 <sup>13</sup>C-NMR Spectrum of [bpmtmp] 2a**

# User Spectrum Plot Report

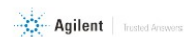

| Name           | P.G-273        | Rack Pos.    | Instrument    | Instrument 1 | Operator                           |
|----------------|----------------|--------------|---------------|--------------|------------------------------------|
| Inj. Vol. (ul) | 5              | Plate Pos.   | IRM Status    |              |                                    |
| Data File      | P.G-273_0002.d | Method (Acq) | scan_method.m | P.G-273      | Acq. Time (Local)                  |
|                |                |              |               |              | 08-04-2025 11:00:39 AM (UTC+05:30) |

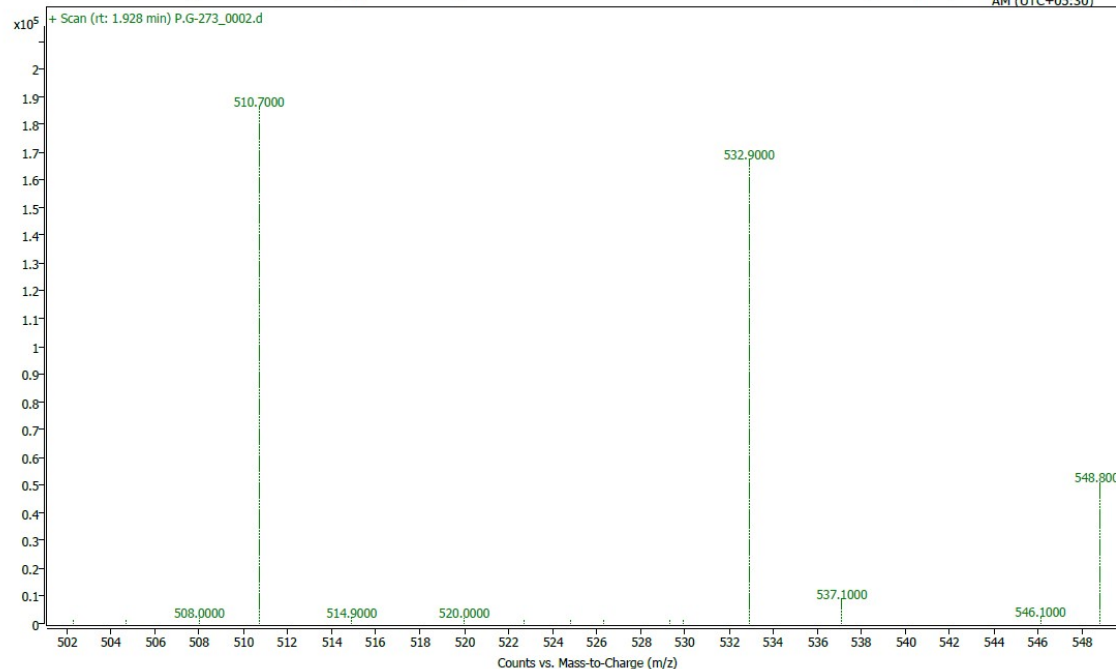

**Fig. S3** ESI-MS spectra of [bpmtmp] **2a**

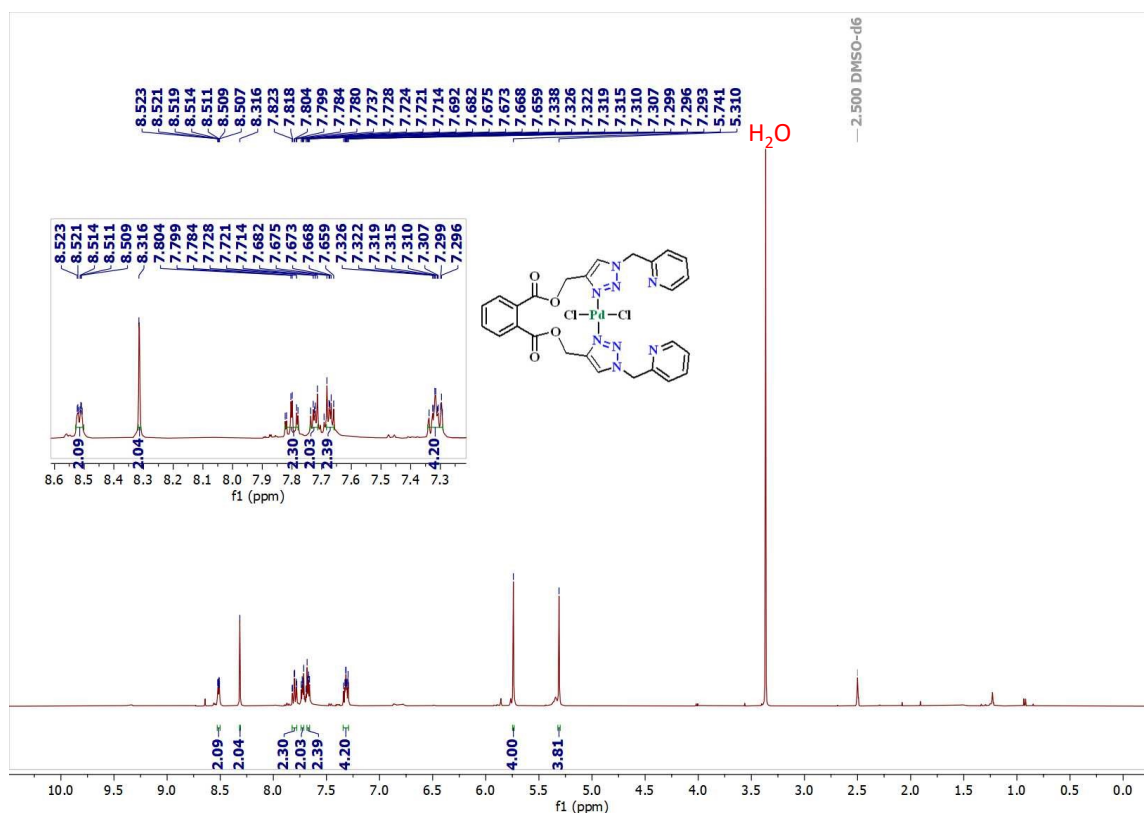

**Fig. S4**  $^1\text{H}$ -NMR Spectrum of  $[\text{PdCl}_2(\text{bpmtmp})]$  **3a**



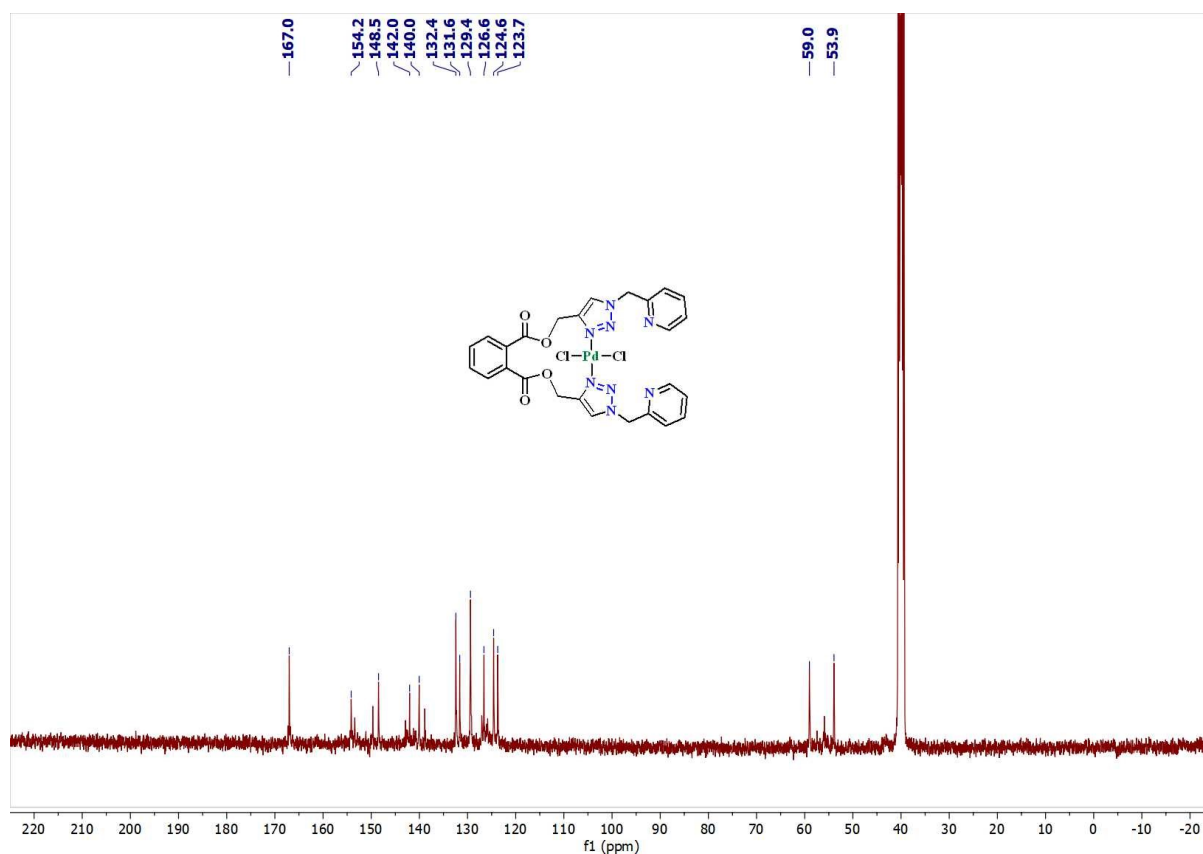

**Fig. S5**  $^{13}C$ -NMR Spectrum of  $[PdCl_2(bpmtmp)]$  3a

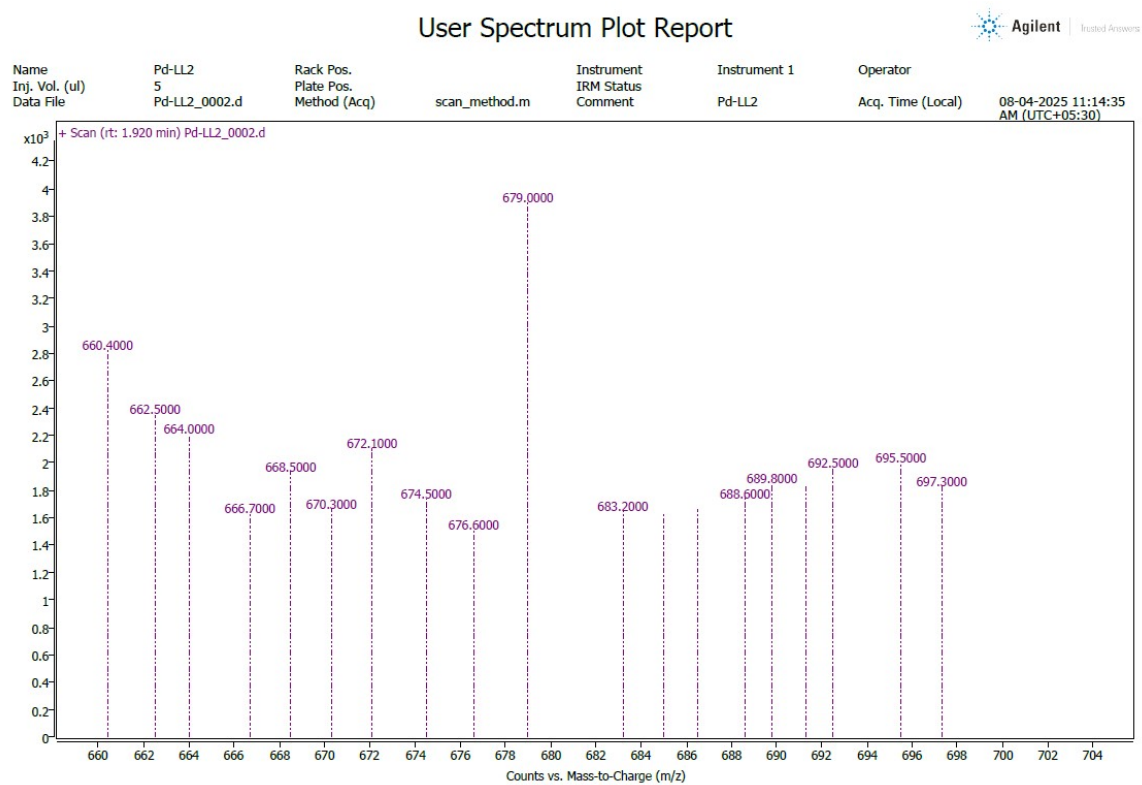

**g. S6** ESI-MS spectra of  $[PdCl_2(bpmtmp)]$  3a

**Fi**

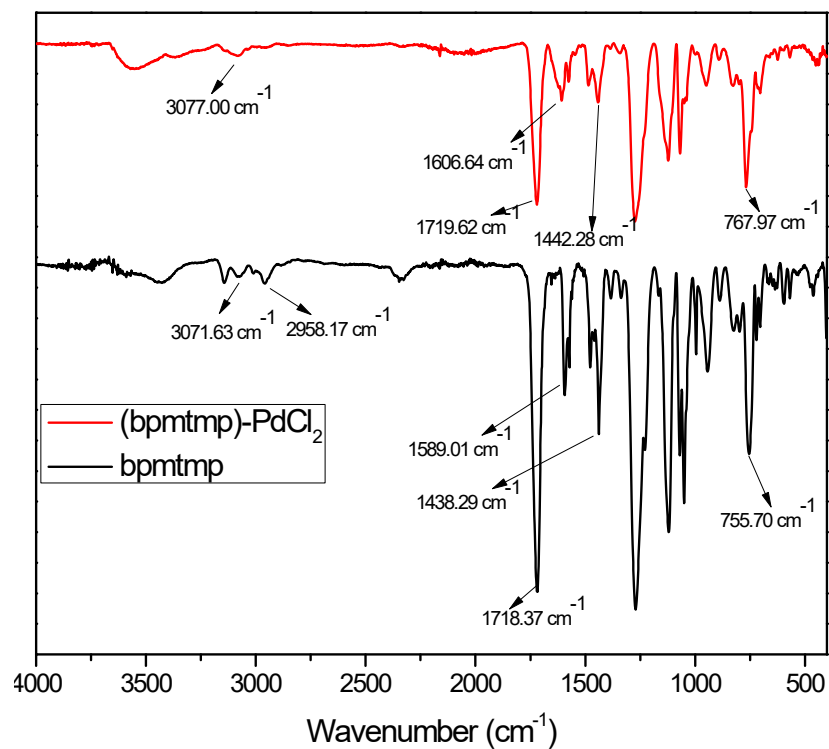

**Fig. S7** FT-IR spectra of  $[\text{PdCl}_2(\text{bpmtmp})]$  **3a** and  $\text{bpmtmp}$  (**2a**)

**Graphic report**

|    | ht [mg] | Name            | N [%] | C [%] | H [%] | S [%] | Date       | Time  |
|----|---------|-----------------|-------|-------|-------|-------|------------|-------|
| 25 | 1.9590  | $\text{PdCl}_2$ | 15.92 | 44.98 | 3.108 | 0.000 | 30.04.2025 | 15:16 |

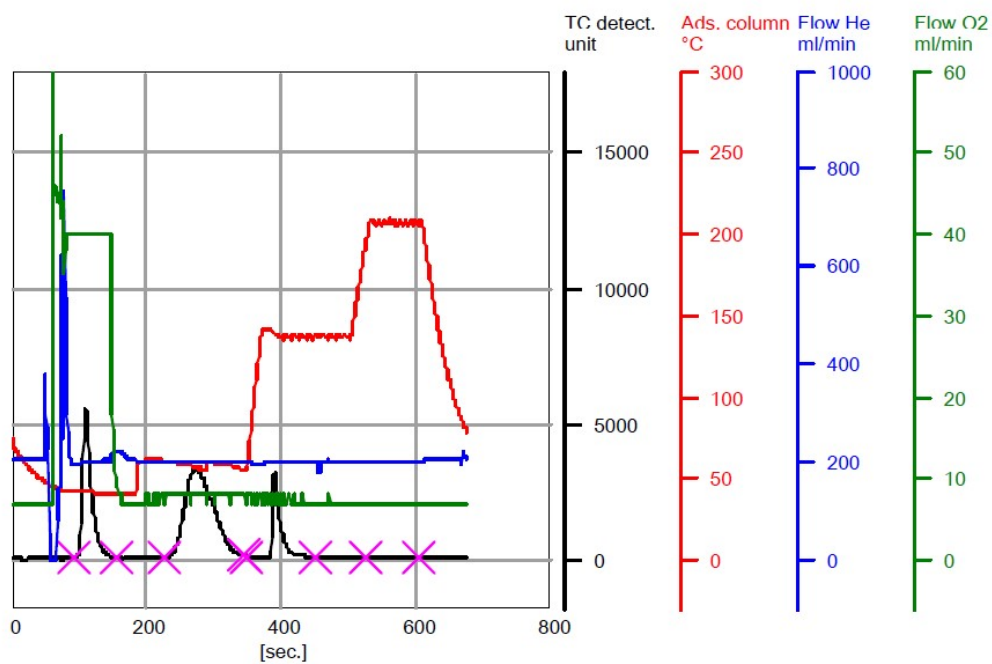

**Fig. S8** Elemental analysis of  $[\text{PdCl}_2(\text{bpmtmp})]$  **3a**

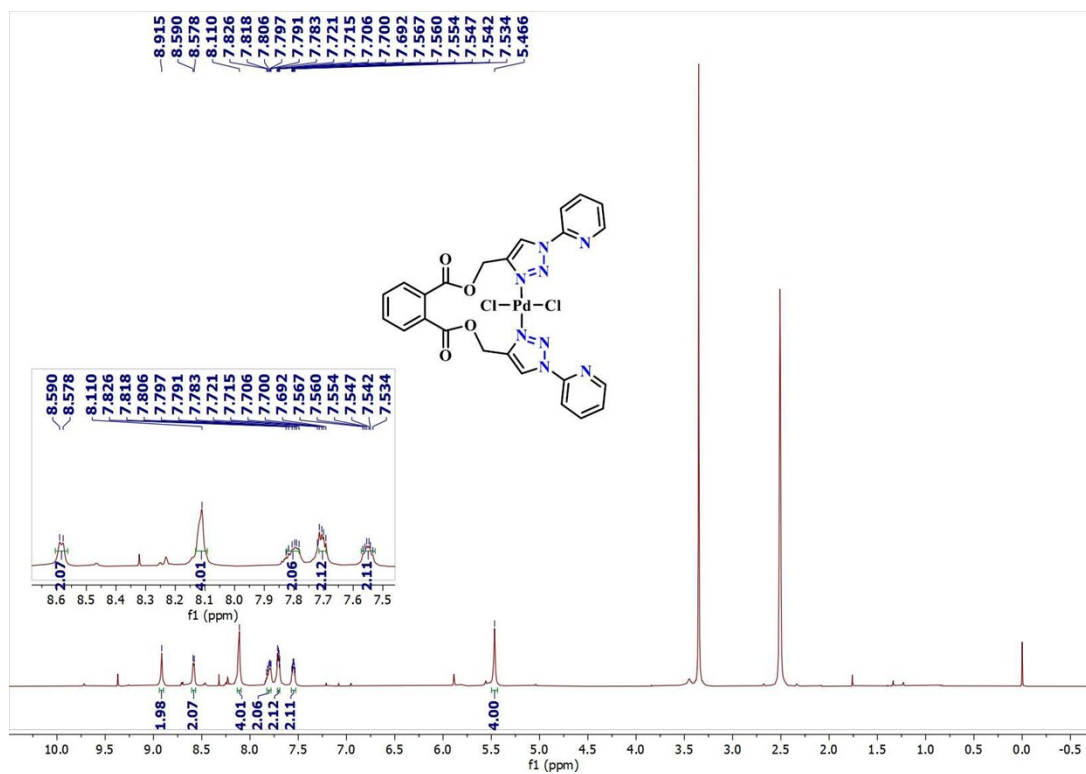

**Fig. S9** <sup>1</sup>H-NMR Spectrum of [PdCl<sub>2</sub>(bptmp)] **3b**

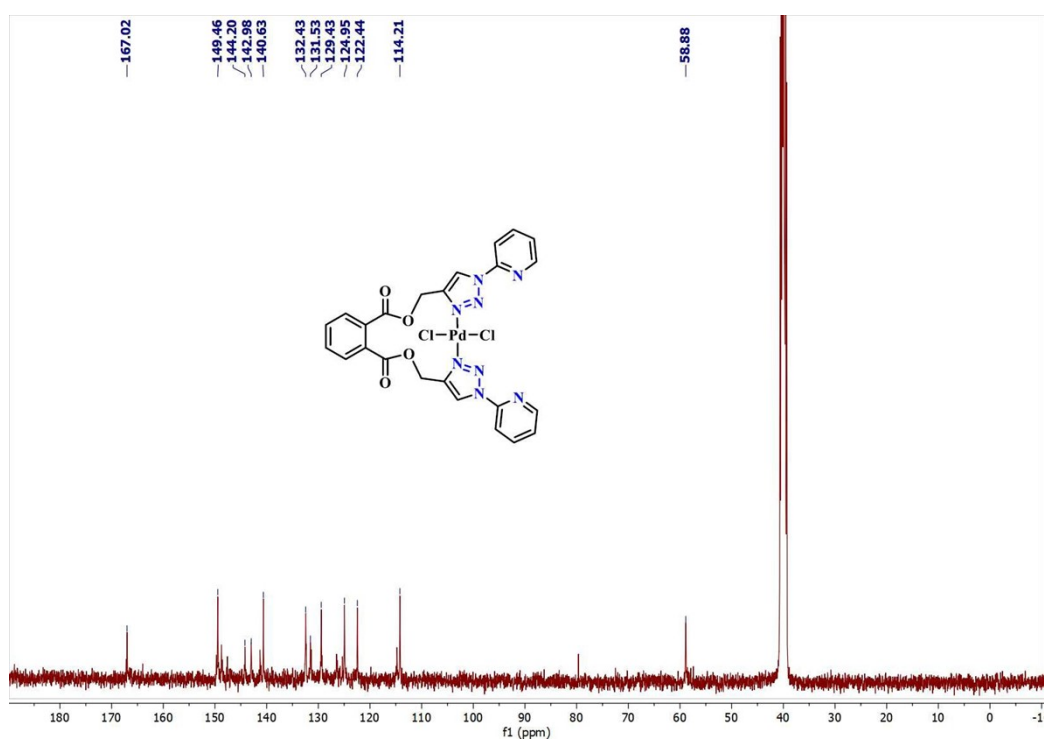

**Fig. S10** <sup>13</sup>C-NMR Spectrum of [PdCl<sub>2</sub>(bptmp)] **3b**

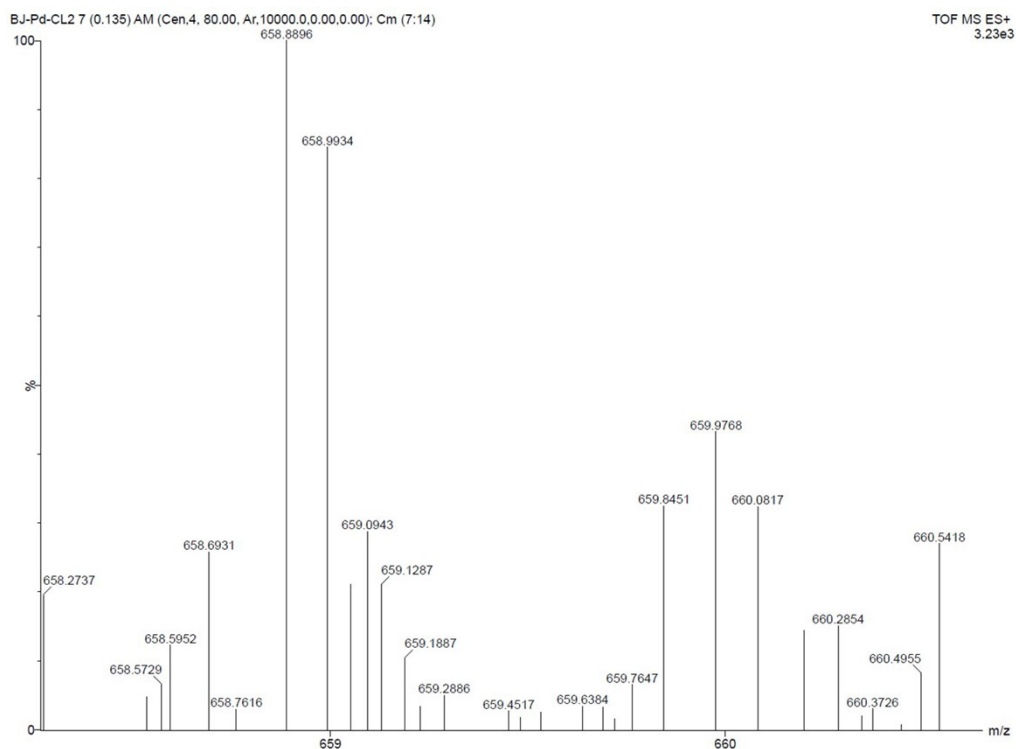

**Fig. S11** ESI-MS spectra of  $[\text{PdCl}_2(\text{bptmp})]$  **3b**

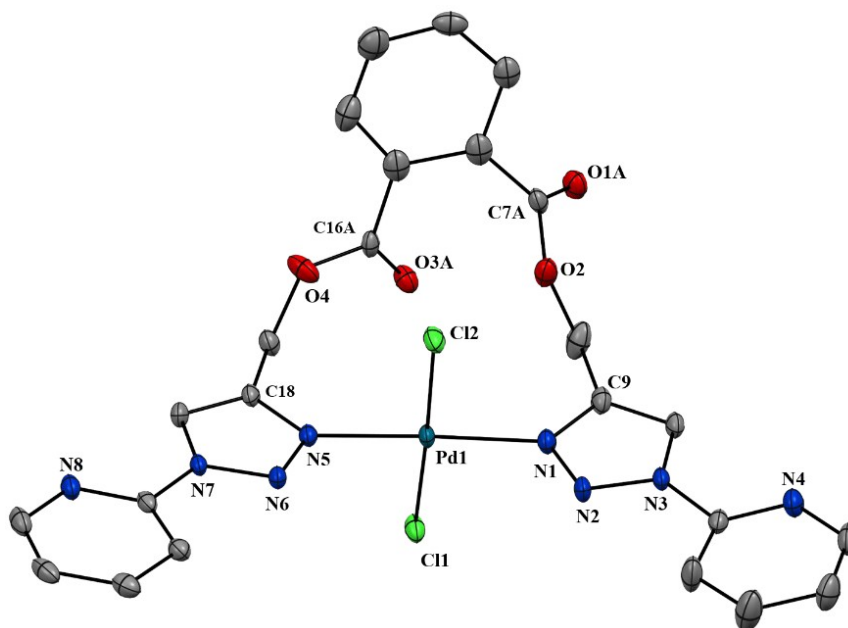

**Fig. S12** Molecular structure and atom numbering scheme of compound **3b**. The thermal ellipsoids are drawn at the 30% probability level. Hydrogen atoms are omitted for clarity. Selected bond lengths [pm] and angles [°]:

## EuroEA Elemental Analyser

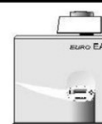

AutoRun Name : 2022-43 (189)  
Date of Analysis : 17 Dec 2022  
Time of Analysis : 15:13:38  
Analysed By : EVR  
Signed By : EVR  
Operator Group : GRP1  
Configuration : CHNS

Sample Name : PdCl<sub>2</sub>(bptmp) B  
Sample Position # : 11  
Type : Smp  
Sample Weight : 1.668 (mg)  
Calibration type : Linear

### Instrument Parameters

|               |                |             |                              |                    |              |            |           |           |
|---------------|----------------|-------------|------------------------------|--------------------|--------------|------------|-----------|-----------|
| Carrier (kPa) | Purge (ml/min) | Oxygen (ml) | Delta P O <sub>2</sub> (kPa) | Sampling Delay (s) | Run Time (s) | Front (°C) | Rear (°C) | Oven (°C) |
| 100           | 80             | 15          | 35                           | 8                  | 500          | 980        | Off       | 100       |

### Chromatogram

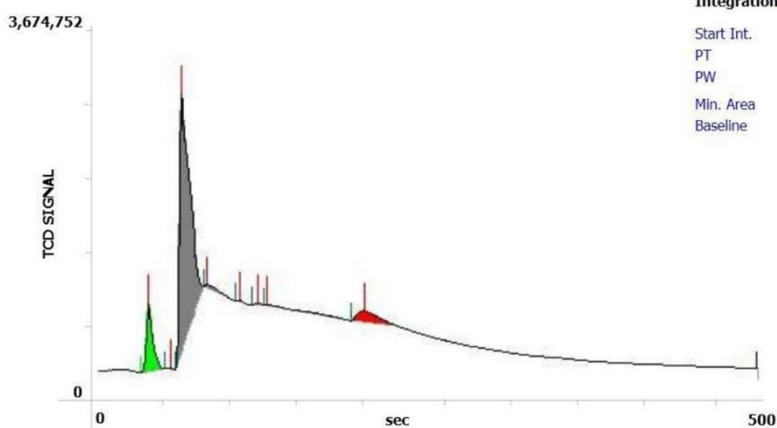

### Integration Parameters

Start Int. : 24  
PT : 1  
PW : 1  
Min. Area : 1000  
Baseline : Valley-Valley

### Results

| Element  | RT (s) | Area      | Area % | Element % |
|----------|--------|-----------|--------|-----------|
| Nitrogen | 39     | 467,862   | 13.020 | 15.680    |
| Carbon   | 83     | 2,814,660 | 78.330 | 43.653    |
| Hydrogen | 201    | 310,811   | 8.650  | 2.224     |
| Sulphur  | -      | -         | -      | -         |

Fig. S13 C,H,N analysis of [PdCl<sub>2</sub>(bptmp)] **3b**

## 7. Kinetics experiment

### Synthesis of 4-*d*<sub>1</sub>-benzothiazole

2-*d*-benzothiazole was synthesized using a modified procedure of Huang et al., benzothiazole (0.210 g, 1.5 mmol) was added to a vigorously stirred solution of silver carbonate (0.124 g, 0.45 mmol), Pd cat. **3a** (0.031 g, 0.045 mmol) and potassium carbonate (0.207 g, 1.5 mmol) in dimethyl sulfoxide (3.0 mL) in the air. D<sub>2</sub>O (0.600 g) was added to it. The reaction mixture was stirred at 80 °C for 6 h. Then the reaction was quenched with saturated NH<sub>4</sub>Cl solution. The product was extracted with ethyl acetate (3 x 20 mL). The combined organic layer was washed with brine and dried over Na<sub>2</sub>SO<sub>4</sub>. After removal of solvents under vacuum, the crude product was purified via column chromatography.

### H/D exchange experiment

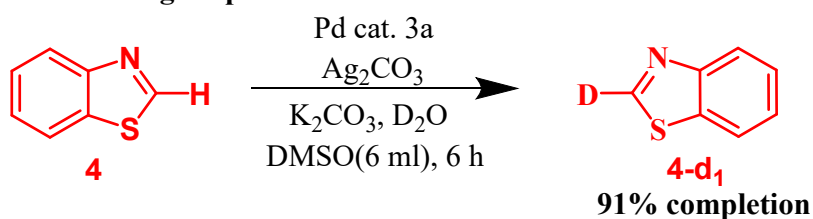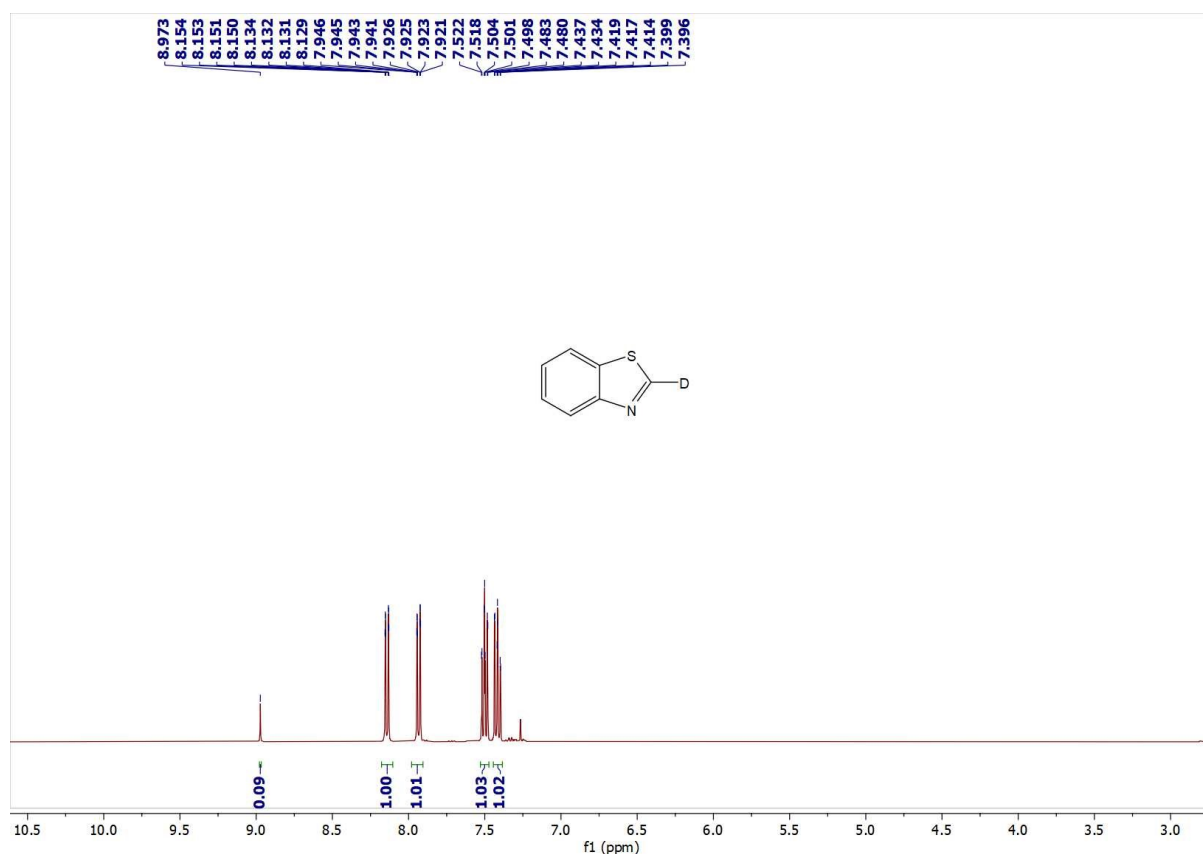

Fig. S14 <sup>1</sup>H-NMR Spectrum of 4-d<sub>1</sub>

### Determination of kinetic isotope effect [KIEs]

Kinetic investigations were conducted in oven-dried and sealed with Teflon caps. Each tube maintained a consistent concentration of both the substrate and catalyst. A time frame of 1 and a half hour was used to record the data. Final results are the average values that were derived from five independent experimental runs. The KIE value ( $K_H/K_D = 1.51$ ) was observed when the parallel reactions were performed. These experiments conclude that the cleavage of C-H bond of azoles may not be the rate determining step.

| t/h \ %yield | 1.5 | 2.5 | 3.5 | 4.5 | 8  |
|--------------|-----|-----|-----|-----|----|
| 4            | 18  | 27  | 39  | 55  | 89 |

|                  |    |    |    |    |    |
|------------------|----|----|----|----|----|
| 4-d <sub>1</sub> | 12 | 21 | 30 | 42 | 63 |
|------------------|----|----|----|----|----|

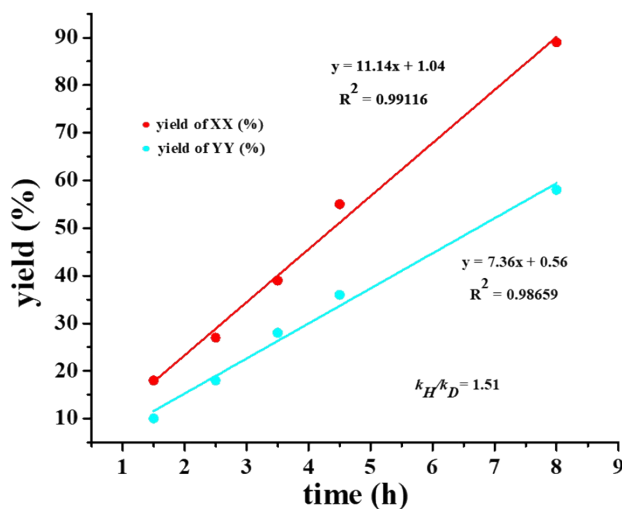

## 8. Mercury drop experiment

To determine whether catalyst 3a operates via a heterogeneous or homogeneous pathway in the C-2 arylation of azoles, a mercury drop experiment was performed. In this test, a reaction mixture with (0.100 g, 0.74 mmol) benzothiazole (**4**), (0.173 g, 0.74 mmol) 2-iodoanisole (**5**), (0.030g, 0.37 mmol) NaOAc, (0.101 g, 0.37 mmol) Ag<sub>2</sub>CO<sub>3</sub> and 0.25 mol% of catalyst 3a was prepared in a 1 ml of HFIP. A drop of mercury was introduced into the reaction, and the mixture was stirred at room temperature for 8 hours. The presence of mercury resulted in an approximately 52% reduction in the yield of the C-2 arylated product of **6b**, indicating that catalyst 3a predominantly functions through a heterogeneous mechanism.

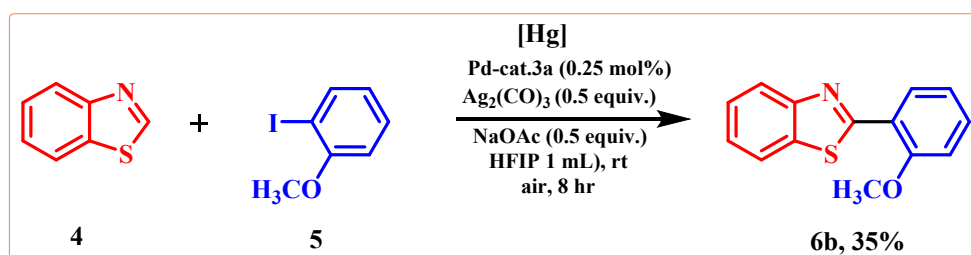

## 9. Representative procedure for C-2 arylation of azoles: synthesis of 2-(2-methoxyphenyl)benzo[d]thiazole (**6b**)

An oven dried reaction tube was charged with (0.100 g, 0.74 mmol) benzothiazole (**4**), (0.173 g, 0.74 mmol) 2-iodoanisole (**5**), (0.030g, 0.37 mmol) NaOAc, (0.101 g, 0.37 mmol) Ag<sub>2</sub>CO<sub>3</sub> and 0.25 mol% of catalyst 3a in a 1 ml of HFIP. The reaction mixture was stirred at room temperature for 8 hours. The completion of the reaction was monitored by TLC at one and a half time intervals. After completion of the reaction, water (20 mL) was added to the reaction mixture, which was then extracted three times with ethyl acetate (CH<sub>3</sub>COOC<sub>2</sub>H<sub>5</sub>, 25 mL each). The combined organic extracts were dried over anhydrous Na<sub>2</sub>SO<sub>4</sub>, and the solvent was

removed under reduced pressure. The resulting residue was purified by silica gel column chromatography using a gradient of n-hexane-ethyl acetate (30:1 to 20:1), affording compound **6b** as an off-white solid (0.155 g, 87% yield).

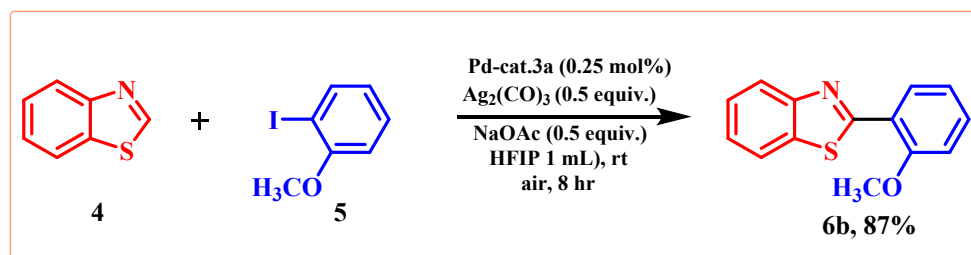

## 10. Characterization data for C-2 arylated azoles

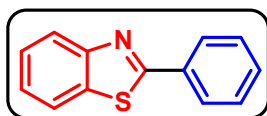

**2-phenylbenzo[d]thiazole (6a):** The representative procedure was followed, using **4** (0.100 g, 0.74 mmol) and iodo/bromo-benzene **5** (0.150 g for I and 0.116 g for Br, 0.74 mmol). Purification by column chromatography on silica gel (n-hexane) yielded **6a** (0.145 g, I = 93%, 0.136 g, Br = 87%) as a white solid.  $^1\text{H}$  NMR (400 MHz,  $\text{CDCl}_3$ )  $\delta$  8.03- 8.00 (m, 3H), 7.85- 7.82 (m, 1H), 7.44 – 7.40 (m, 4H), 7.34- 7.29 (m, 1H). This compound is further confirmed by ref.<sup>6</sup>

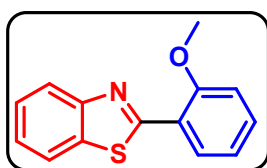

**2-(2-methoxyphenyl)benzo[d]thiazole (6b):** Yielded **6b** as an off-white solid (0.155 g, I = 87%, 0.128 g, Br = 72%).  $^1\text{H}$  NMR (400 MHz,  $\text{CDCl}_3$ )  $\delta$  8.47- 8.44 (m, 1H), 8.02- 8.00 (m, 1H), 7.86 – 7.84 (m, 1H), 7.44- 7.37 (m, 2H), 7.32 – 7.28 (m, 1H), 7.08- 7.04 (m, 1H), 7.01- 6.99 (m, 1H), 3.99 (s, 3H). This compound is further confirmed by ref.<sup>7</sup>

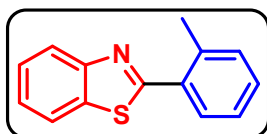

**2-(o-tolyl)benzo[d]thiazole (6c):** The representative procedure was followed, using **4** (0.100 g, 0.74 mmol) and 2-iodo/bromo-toluene **5** (0.161 g for I and 0.126 g for Br, 0.74 mmol). Purification by column chromatography on silica gel (n-hexane/EtOAc: 25/1) yielded **6c** (0.135 g, I = 81%, 0.106 g, Br = 64%) as a white solid.  $^1\text{H}$  NMR (400 MHz,  $\text{CDCl}_3$ )  $\delta$  8.04- 8.02 (m, 1H), 7.87- 8.85 (m, 1H), 7.70- 7.67 (m, 1H), 7.46- 7.42 (m, 1H), 7.36 – 7.22 (m, 4H), 2.59 (s, 3H). This compound is further confirmed by ref.<sup>7</sup>

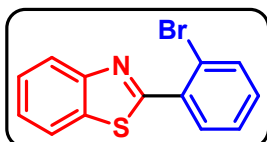



**2-(o-tolyl)benzo[d]thiazole (6d):** The representative procedure was followed, using **4** (0.100 g, 0.74 mmol) and 1-bromo-2-iodobenzene/1,2-di-bromobenzene **5** (0.209 g for I and 0.174 g for Br, 0.74 mmol). Purification by column chromatography on silica gel (n-hexane/EtOAc: 20/1) yielded **6d** (0.178 g, I = 83%, 0.109 g, Br = 51%) as a white solid. <sup>1</sup>H NMR (400 MHz, CDCl<sub>3</sub>) δ 8.16-8.13 (m, 1H), 8.00 (dd, *J* = 7.6, 1.6 Hz, 1H), 7.97-7.94 (m, 1H), 7.75 (dd, *J* = 8.4, 1.2 Hz, 1H), 7.56-7.52 (m, 1H), 7.48-7.43 (m, 2H), 7.36-7.32 (m, 1H). This compound is further confirmed by ref.<sup>7</sup>

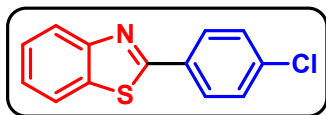

**2-(4-chlorophenyl)benzo[d]thiazole (6f):** The representative procedure was followed, using **4** (0.100 g, 0.74 mmol) and 4-chloro-iodobenzene **5** (0.176 g, 0.74 mmol). Purification by column chromatography on silica gel (n-hexane/EtOAc: 30/1) yielded **6f** (0.154 g, I = 85%) as an off white solid. <sup>1</sup>H NMR (400 MHz, CDCl<sub>3</sub>) δ 8.00- 7.98 (m, 1H), 7.97 – 7.94 (m, 2H), 7.84- 7.82 (m, 1H), 7.45 – 7.38 (m, 3H), 7.35- 7.31 (m, 1H). This compound is further confirmed by ref.<sup>6</sup>

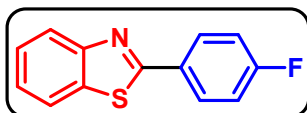

**2-(4-fluorophenyl)benzo[d]thiazole (6g):** The representative procedure was followed, using **4** (0.100 g, 0.74 mmol) and 4-fluoro-iodobenzene **5** (0.164 g, 0.74 mmol). Purification by column chromatography on silica gel (n-hexane/EtOAc: 20/1) yielded **6g** (0.133 g, I = 79%) as a white solid. <sup>1</sup>H NMR (400 MHz, CDCl<sub>3</sub>) δ 8.10-8.04 (m, 3H), 7.90 – 7.87 (m, 1H), 7.51- 7.47 (m, 1H), 7.40-7.36(m, 1H), 7.20 – 7.14 (m, 2H). <sup>13</sup>C NMR (101 MHz, CDCl<sub>3</sub>) δ 165.7 (s), 164.7 (s), 162.2 (s), 153.1 (s), 134.0 (s), 128.9 (s), 128.9 (s), 128.5 (s), 128.5 (s), 125.4 (s), 124.2 (s), 122.2 (s), 120.6 (s), 115.3 (s), 115.0 (s). <sup>19</sup>F NMR (376 MHz, CDCl<sub>3</sub>) δ -108.79. This compound is further confirmed by ref.<sup>6</sup>

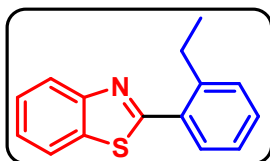

**2-(2-ethylphenyl)benzo[d]thiazole (6h):** The representative procedure was followed, using **4** (0.100 g, 0.74 mmol) and 2-ethyl-iodobenzene **5** (0.171 g, 0.74 mmol). Purification by column chromatography on silica gel (n-hexane/EtOAc: 30/1) yielded **6h** (0.134 g, I = 76%) as pale-yellow solid. <sup>1</sup>H NMR (400 MHz, CDCl<sub>3</sub>) δ 8.01 (d, *J* = 8.1 Hz, 1H), 7.83 (d, *J* = 8.0 Hz, 1H), 7.59- 7.56 (m, 1H), 7.44 – 7.40 (m, 1H), 7.35- 7.27 (m, 3H), 7.23- 7.19 (m, 1H), 2.95 (q, *J* = 7.6 Hz, 2H), 1.13 (t, *J* = 7.6 Hz, 3H). <sup>13</sup>C NMR (101 MHz, CDCl<sub>3</sub>) δ 166.8 (s), 152.8 (s), 142.4 (s), 134.7 (s), 131.7 (s), 129.7 (s), 129.2 (s), 128.8 (s), 125.1 (s), 124.9 (s), 124.0 (s), 122.4 (s), 120.3 (s), 25.7 (s), 14.6 (s). This compound is further confirmed by ref.<sup>11</sup>

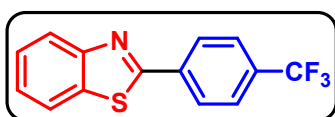

**2-(4-(trifluoromethyl)phenyl)benzo[d]thiazole (6i):** The representative procedure was followed, using **4** (0.100 g, 0.74 mmol) and 4-(trifluoromethyl)-iodobenzene/-bromobenzene **5** (0.201 g for I and 0.166 g for Br, 0.74 mmol). Purification by column chromatography on silica gel (n-hexane/EtOAc: 30/1) yielded **6i** (0.169 g, I = 82%, 0.101 g, Br = 49%) as a white solid.  $^1\text{H}$  NMR (400 MHz,  $\text{CDCl}_3$ )  $\delta$  8.15- 8.07(m, 3H), 7.87 (d,  $J$  = 8.1 Hz, 1H), 7.70 (d,  $J$  = 8.4 Hz, 2H), 7.51- 7.39 (m, 2H).  $^{13}\text{C}$  NMR (101 MHz,  $\text{CDCl}_3$ )  $\delta$  165.0 (s), 153.0 (s), 135.8 (s), 134.2 (s), 131.6 (s), 131.3 (s), 126.7 (s), 125.8 (s), 125.6 (s), 125.1 (s), 125.0 (s), 124.9 (s), 124.9 (s), 124.8 (s), 124.2 (s), 123.1 (s), 122.6 (s), 121.4 (s), 121.0 (s), 120.7 (s).  $^{19}\text{F}$  NMR (376 MHz,  $\text{CDCl}_3$ )  $\delta$  -62.73. This compound is further confirmed by ref.<sup>8</sup>

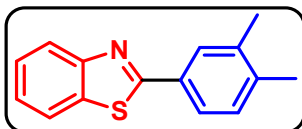

**2-(3,4-dimethylphenyl)benzo[d]thiazole (6j):** The representative procedure was followed, using **4** (0.100 g, 0.74 mmol) and 3,4-dimethyl-iodobenzene **5** (0.171 g, 0.74 mmol). Purification by column chromatography on silica gel (n-hexane/EtOAc: 20/1) yielded **6j** (0.148 g, I = 84%) as a white solid.  $^1\text{H}$  NMR (400 MHz,  $\text{CDCl}_3$ )  $\delta$  7.97 (d,  $J$  = 8.0 Hz, 1H), 7.79 (d,  $J$  = 8.4 Hz, 2H), 7.72- 7.69 (m, 1H), 7.41 – 7.36 (m, 1H), 7.29- 7.25 (m, 1H), 7.16-7.14 (m, 1H), 2.27 (s, 3H), 2.24 (s, 3H).  $^{13}\text{C}$  NMR (101 MHz,  $\text{CDCl}_3$ )  $\delta$  167.4 (s), 153.1 (s), 139.1 (s), 136.4 (s), 133.9 (s), 130.2 (s), 129.2 (s), 127.4 (s), 125.2 (s), 124.1 (s), 123.9 (s), 121.9 (s), 120.5 (s), 18.8 (s), 18.7 (s). This compound is further confirmed by ref.<sup>12</sup>

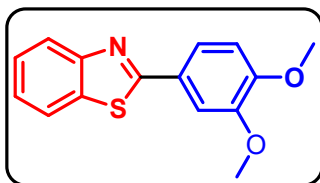

**2-(3,4-dimethoxyphenyl)benzo[d]thiazole (6l):** The representative procedure was followed, using **4** (0.100 g, 0.74 mmol) and 3,4-dimethoxy-iodobenzene **5** (0.195 g, 0.74 mmol). Purification by column chromatography on silica gel (n-hexane/EtOAc: 20/1) yielded **6l** (0.162 g, I = 81%) as a pale-yellow solid.  $^1\text{H}$  NMR (400 MHz,  $\text{CDCl}_3$ )  $\delta$  8.05- 8.02 (m, 1H), 7.89- 7.86 (m, 1H), 7.71 (d,  $J$  = 2.0 Hz, 1H), 7.61- 7.58 (m, 1H), 7.50- 7.45 (m, 1H), 7.38- 7.34 (m, 1H), 6.94 (d,  $J$  = 8.4 Hz, 1H), 4.02 (s, 3H), 3.95 (s, 3H). This compound is further confirmed by ref.<sup>7</sup>

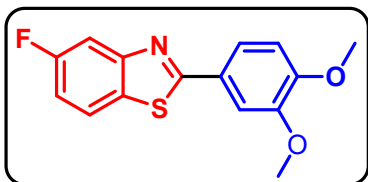

**2-(3,4-dimethoxyphenyl)-5-fluorobenzo[d]thiazole (6m):** The representative procedure was followed, using **4** (5-fluorobenzothiazole) (0.100 g, 0.74 mmol) and 3,4-dimethoxy-iodobenzene **5** (0.172 g, 0.74 mmol). Purification by column chromatography on silica gel (n-hexane/EtOAc: 20/1) yielded **6m** (0.149 g, I = 79%) as a pale-yellow solid.  $^1\text{H}$  NMR (400 MHz,  $\text{CDCl}_3$ )  $\delta$  7.81- 7.77 (m, 1H), 7.72 – 7.69 (m, 2H), 7.60 – 7.57 (m, 1H), 7.16- 7.10 (m, 1H), 6.95 (d,  $J$  = 8.4 Hz, 1H), 4.02 (s, 3H), 3.96 (s, 3H).  $^{13}\text{C}$  NMR (101 MHz,  $\text{CDCl}_3$ )  $\delta$  170.4

(s), 163.1 (s), 160.7 (s), 155.1 (s), 154.9 (s), 151.8 (s), 149.3 (s), 126.3 (s), 122.2 (s), 122.1 (s), 121.2 (s), 113.6 (s), 113.3 (s), 110.9 (s), 109.8 (s), 109.1 (s), 108.9 (s), 56.1 (s), 56.1 (s). This compound is further confirmed by ref.<sup>7</sup>

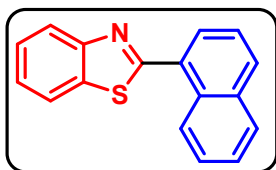

**2-(naphthalen-1-yl)benzo[d]thiazole (6n):** The representative procedure was followed, using **4** (0.100 g, 0.74 mmol) and 1-iodonephthalene **5** (0.187 g, 0.74 mmol). Purification by column chromatography on silica gel (n-hexane/EtOAc: 30/1) yielded **6s** (0.156 g, I = 81%) as a white solid. <sup>1</sup>H NMR (400 MHz, CDCl<sub>3</sub>) δ 8.94 – 8.90 (m, 1H), 8.20– 8.18 (m, 1H), 8.00 – 7.91 (m, 4H), 7.64 – 7.52 (m, 4H), 7.47– 7.43 (m, 1H). This compound is further confirmed by ref.<sup>7</sup>

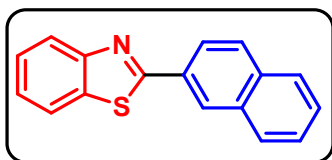

**2-(naphthalen-2-yl)benzo[d]thiazole (6o):** The representative procedure was followed, using **4** (0.100 g, 0.74 mmol) and 2-iodonephthalene **5** (0.187 g, 0.74 mmol). Purification by column chromatography on silica gel (n-hexane/EtOAc: 30/1) yielded **6t** (0.152 g, I = 79%) as a white solid. <sup>1</sup>H NMR (400 MHz, CDCl<sub>3</sub>) δ 8.22 (s, 1H), 7.88– 7.86 (m, 1H), 7.80 – 7.78 (m, 1H), 7.63 – 7.52 (m, 4H), 7.23 – 7.16 (m, 3H), 7.08– 7.04 (m, 1H). This compound is further confirmed by ref.<sup>7</sup>

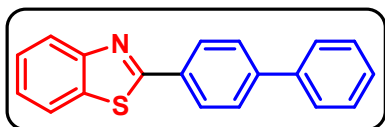

**2-([1,1'-biphenyl]-4-yl)benzo[d]thiazole (6p):** The representative procedure was followed, using **4** (0.100 g, 0.74 mmol) and 4-iodobiphenyl **5** (0.206 g, 0.74 mmol). Purification by column chromatography on silica gel (n-hexane/EtOAc: 20/1) yielded **6u** (0.178 g, I = 84%) as a white solid. <sup>1</sup>H NMR (400 MHz, CDCl<sub>3</sub>) δ 8.19 – 8.15 (m, 2H), 8.10– 8.08 (m, 1H), 7.93 – 7.90 (m, 1H), 7.74 – 7.71 (m, 2H), 7.67 – 7.65 (m, 2H), 7.53 – 7.46 (m, 3H), 7.42 – 7.37 (m, 2H). This compound is further confirmed by ref.<sup>7</sup>

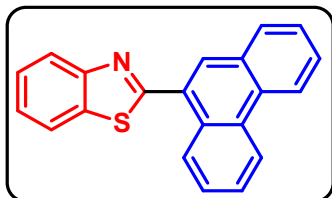

**2-(phenanthren-9-yl)benzo[d]thiazole (6q):** The representative procedure was followed, using **4** (0.100 g, 0.74 mmol) and 9-iodophenanthrene **5** (0.224 g, 0.74 mmol). Purification by column chromatography on silica gel (n-hexane/EtOAc: 30/1) yielded **6v** (0.172 g, I = 75%) as a pale-yellow solid. <sup>1</sup>H NMR (400 MHz, CDCl<sub>3</sub>) δ 8.92 – 8.90 (m, 1H), 8.80 – 8.76 (m,

1H), 8.74 – 8.71 (m, 1H), 8.22 – 8.20 (m, 2H), 8.00 – 7.96 (m, 2H), 7.75 – 7.63 (m, 4H), 7.59– 7.55 (m, 1H), 7.49– 7.45 (m, 1H). This compound is further confirmed by ref.<sup>7</sup>

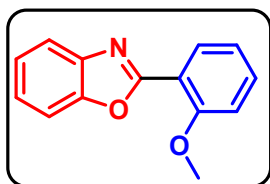

**2-(2-methoxyphenyl)benzo[d]oxazole (6r):** The representative procedure was followed, using **4** (0.100 g, 0.84 mmol) and 2-methoxy-iodobenzene **5** (0.196 g, 0.84 mmol). Purification by column chromatography on silica gel (n-hexane/EtOAc: 25/1) yielded **6n** (0.117 g, I = 62%) as a white solid. <sup>1</sup>H NMR (400 MHz, CDCl<sub>3</sub>) δ 8.07 (d, *J* = 8.1 Hz, 1H), 7.77– 7.73 (m, 1H), 7.54 – 7.50 (m, 1H), 7.46 – 7.41 (m, 1H), 7.30– 7.25 (m, 2H), 7.05– 7.01 (m, 2H), 3.95 (s, 3H). This compound is further confirmed by ref.<sup>13</sup>

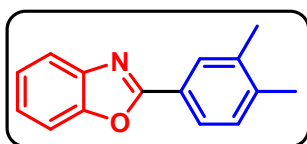

**2-(3,4-dimethylphenyl)benzo[d]oxazole (6s):** The representative procedure was followed, using **4** (0.100 g, 0.84 mmol) and 1-iodo-3,4-dimethylbenzene **5** (0.195 g, 0.84 mmol). Purification by column chromatography on silica gel (n-hexane/EtOAc: 25/1) yielded **6o** (0.121 g, I = 65%) as a pale-yellow solid. <sup>1</sup>H NMR (400 MHz, CDCl<sub>3</sub>) δ 7.84 (s, 1H), 7.78– 7.76 (m, 1H), 7.59 – 7.54 (m, 1H), 7.37 – 7.33 (m, 1H), 7.16 – 7.10 (m, 2H), 7.07– 7.05 (m, 1H), 2.15 (s, 3H), 2.12 (s, 3H). This compound is further confirmed by ref.<sup>14</sup>

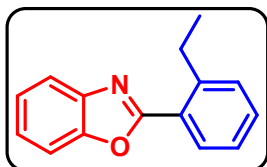

**2-(2-ethylphenyl)benzo[d]oxazole (6t):** The representative procedure was followed, using **4** (0.100 g, 0.84 mmol) and 2-ethyl-iodobenzene **5** (0.194 g, 0.84 mmol). Purification by column chromatography on silica gel (n-hexane/EtOAc: 20/1) yielded **6p** (0.110 g, I = 59%) as a white solid. <sup>1</sup>H NMR (400 MHz, CDCl<sub>3</sub>) δ 8.13– 8.10 (m, 1H), 7.81 – 7.77 (m, 1H), 7.60 – 7.57 (m, 1H), 7.47– 7.43 (m, 1H), 7.39 – 7.32 (m, 4H), 3.23 (q, *J* = 7.6 Hz, 2H), 1.29 (t, *J* = 7.2 Hz, 3H). <sup>13</sup>C NMR (101 MHz, CDCl<sub>3</sub>) δ 163.1 (s), 150.2 (s), 144.8 (s), 141.9 (s), 130.9 (s), 130.1 (s), 129.9 (s), 125.8 (s), 125.5 (s), 124.8 (s), 124.1 (s), 119.9 (s), 110.3 (s), 27.3 (s), 15.3 (s).

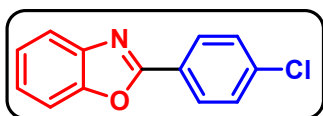

**2-(4-chlorophenyl)benzo[d]oxazole (6u):** The representative procedure was followed, using **4** (0.100 g, 0.84 mmol) and 4-chloro-iodo/bromo-benzene **5** (0.200 g for I, 0.160 g for Br, 0.84

mmol). Purification by column chromatography on silica gel (n-hexane/EtOAc: 25/1) yielded **6q** (0.129 g, I = 63%, 0.38 g, I = 20%) as a white solid.  $^1\text{H}$  NMR (400 MHz,  $\text{CDCl}_3$ )  $\delta$  8.21 – 8.17 (m, 2H), 7.80 – 7.75 (m, 1H), 7.59 – 7.56 (m, 1H), 7.52 – 7.49 (m, 2H), 7.39 – 7.34 (m, 2H). This compound is further confirmed by ref.<sup>15</sup>

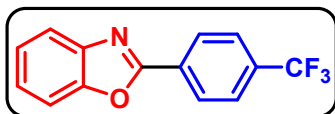

**2-(4-(trifluoromethyl)phenyl)benzo[d]oxazole (6v):** The representative procedure was followed, using **4** (0.100 g, 0.84 mmol) and 4-(trifluoromethyl)-iodobenzene **5** (0.228 g, 0.84 mmol). Purification by column chromatography on silica gel (n-hexane/EtOAc: 25/1) yielded **6o** (0.149 g, I = 63%) as a white solid.  $^1\text{H}$  NMR (400 MHz,  $\text{CDCl}_3$ )  $\delta$  8.35-8.33 (m, 2H), 7.80 – 7.75 (m, 3H), 7.60 – 7.56 (m, 1H), 7.40 – 7.35 (m, 2H).  $^{13}\text{C}$  NMR (101 MHz,  $\text{CDCl}_3$ )  $\delta$  160.5 (s), 149.8 (s), 140.9 (s), 129.4 (s), 126.8 (s), 124.9 (s), 124.9 (s), 124.9 (s), 124.8 (s), 123.9 (s), 119.4 (s), 109.8 (s).  $^{19}\text{F}$  NMR (376 MHz,  $\text{CDCl}_3$ )  $\delta$  -63.07. This compound is further confirmed by ref.<sup>16</sup>

## 11. Application in C-arylation of bi-phenyl pyridine

**2-(4'-methyl-[1,1'-biphenyl]-2-yl)pyridine (9) :** The representative procedure was also utilised in the other application of C-2 arylation of 2-(2-iodophenyl)pyridine. Purification by column chromatography on silica gel (n-hexane/EtOAc: 25/1) yielded **9** (0.158 g, I = 83%) as a light brown liquid.

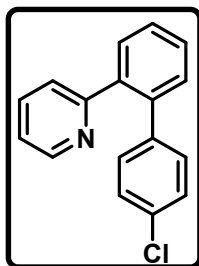

$^1\text{H}$  NMR (400 MHz,  $\text{CDCl}_3$ )  $\delta$  8.63- 8.61 (m, 1H), 7.68 – 7.66 (m, 1H), 7.49 – 7.40 (m, 4H), 7.22 – 7.19 (m, 2H), 7.15- 7.12 (m, 1H), 7.10 – 7.06 (m, 2H), 6.93- 6.91 (m, 1H).  $^{13}\text{C}$  NMR (101 MHz,  $\text{CDCl}_3$ )  $\delta$  158.6 (s), 149.1 (s), 139.4 (s), 139.1 (s), 138.9 (s), 135.1 (s), 132.4 (s), 130.6 (s), 130.2 (s), 129.9 (s), 128.3 (s), 127.9 (s), 127.6 (s), 124.9 (s), 121.1 (s). This compound is further confirmed by ref.<sup>17</sup>

## 12. NMR-data for C-2 arylated products

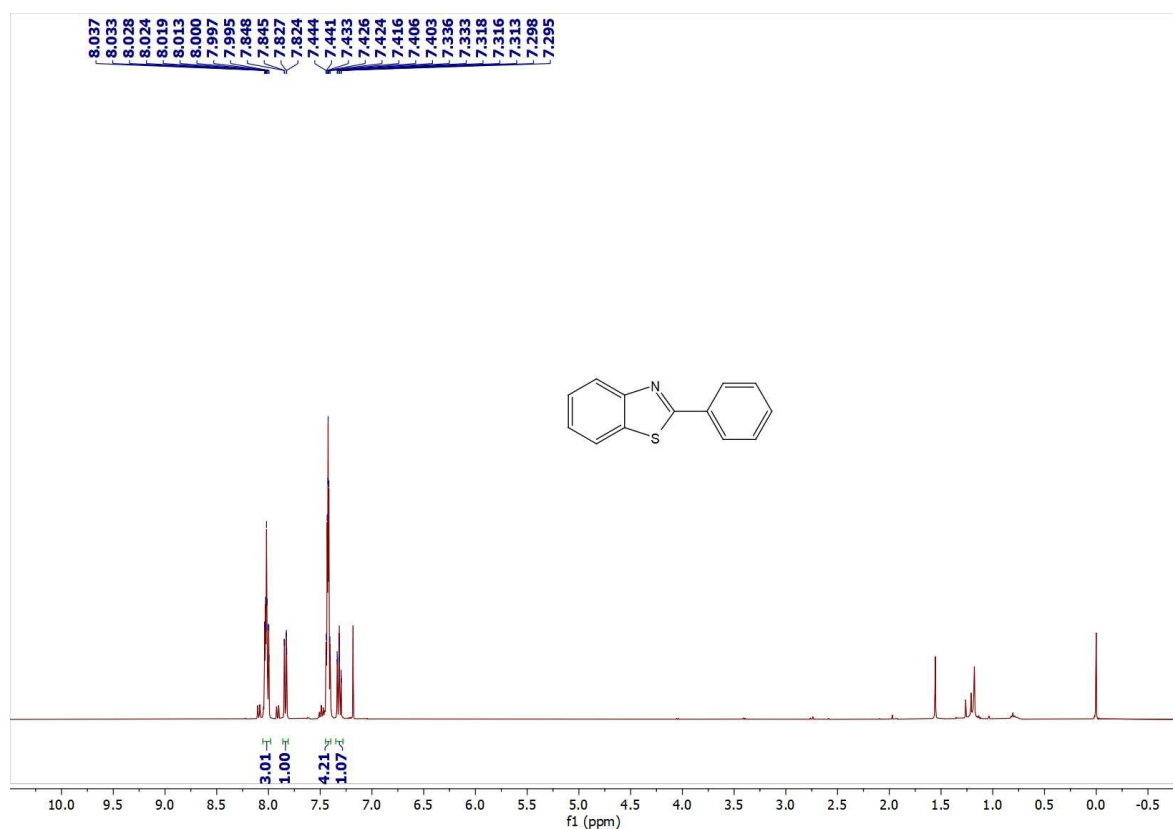

**Fig. S15 <sup>1</sup>H-NMR Spectrum of 6a**

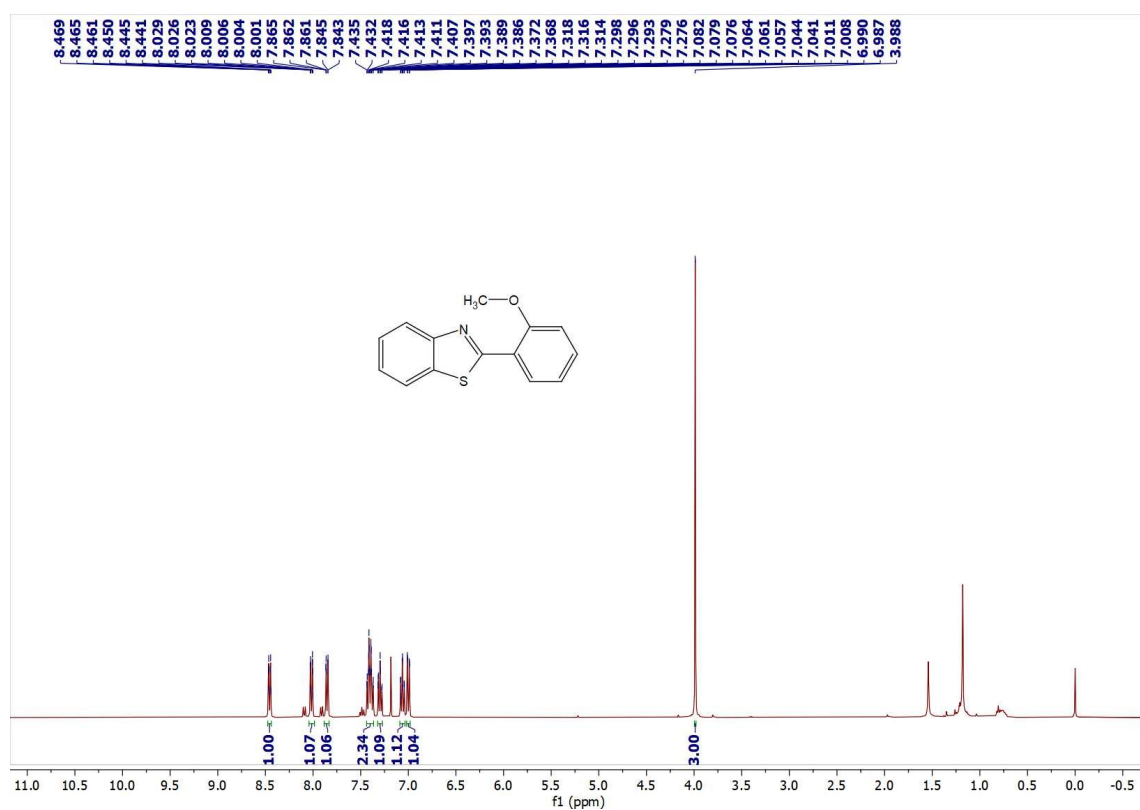

**Fig. S16 <sup>1</sup>H-NMR Spectrum of 6b**

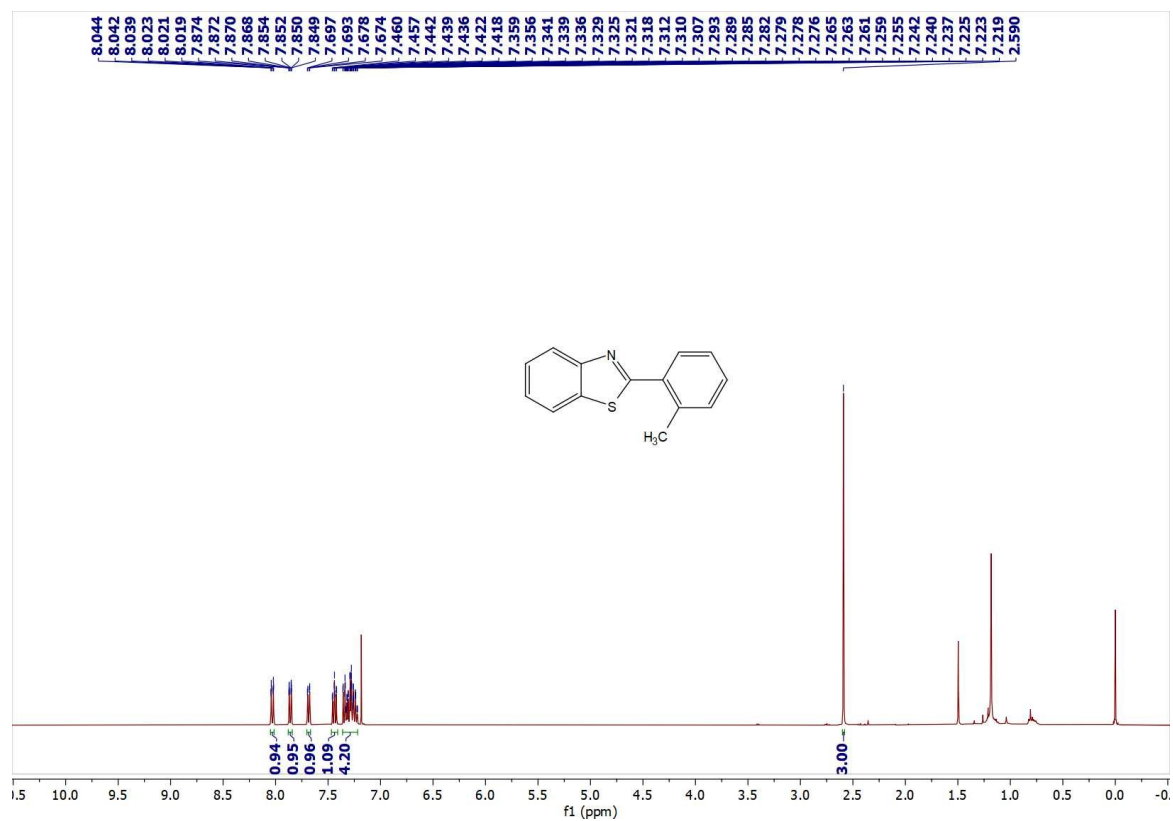

Fig. S17 <sup>1</sup>H-NMR Spectrum of 6c

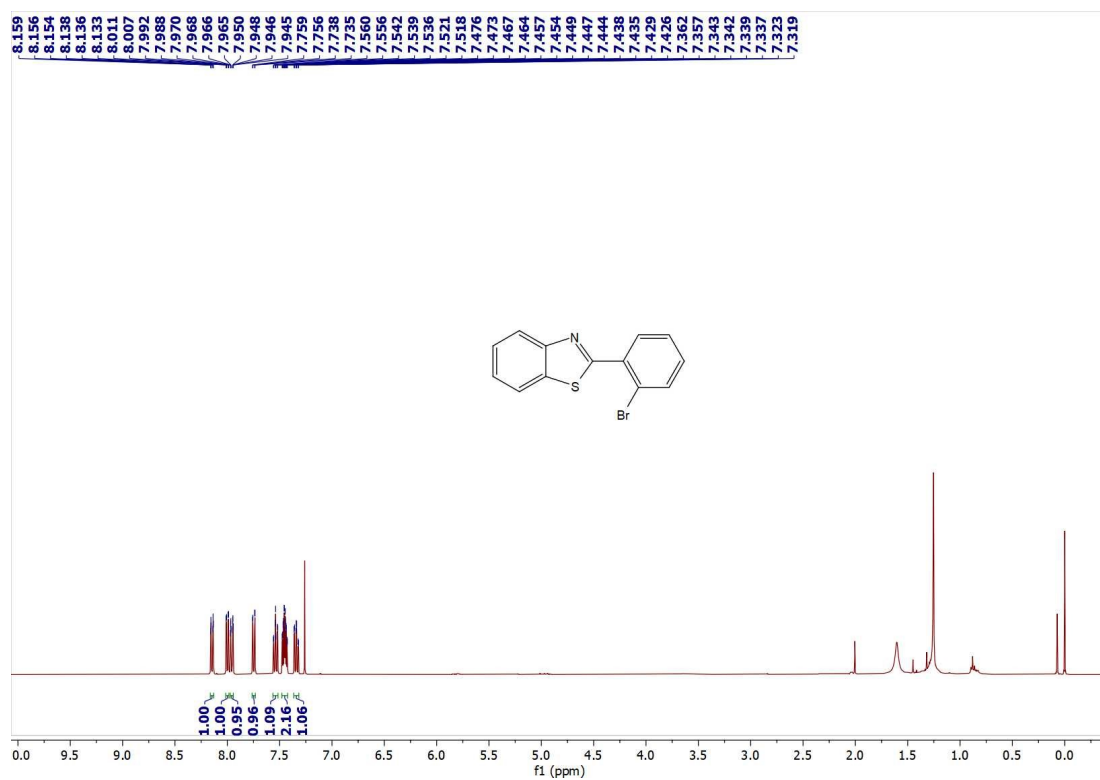

Fig. S18 <sup>1</sup>H-NMR Spectrum of 6d

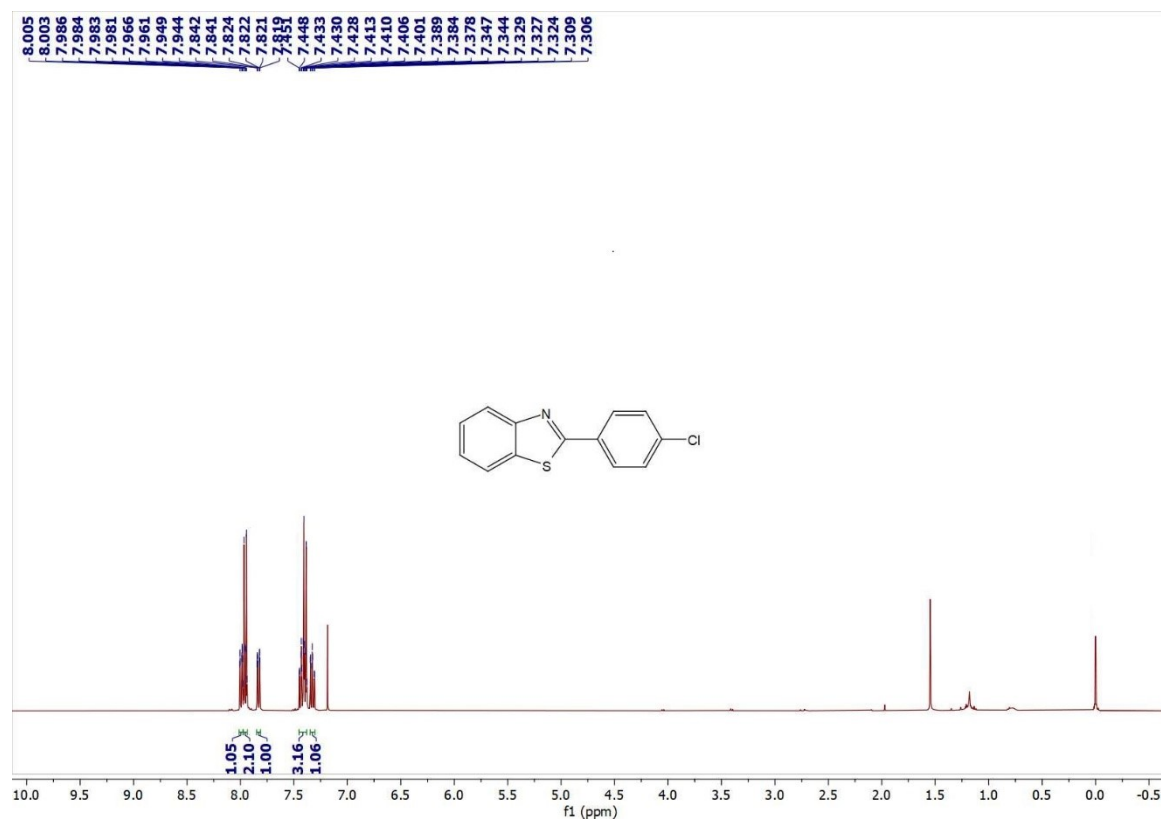

Fig. S19 <sup>1</sup>H-NMR Spectrum of 6f

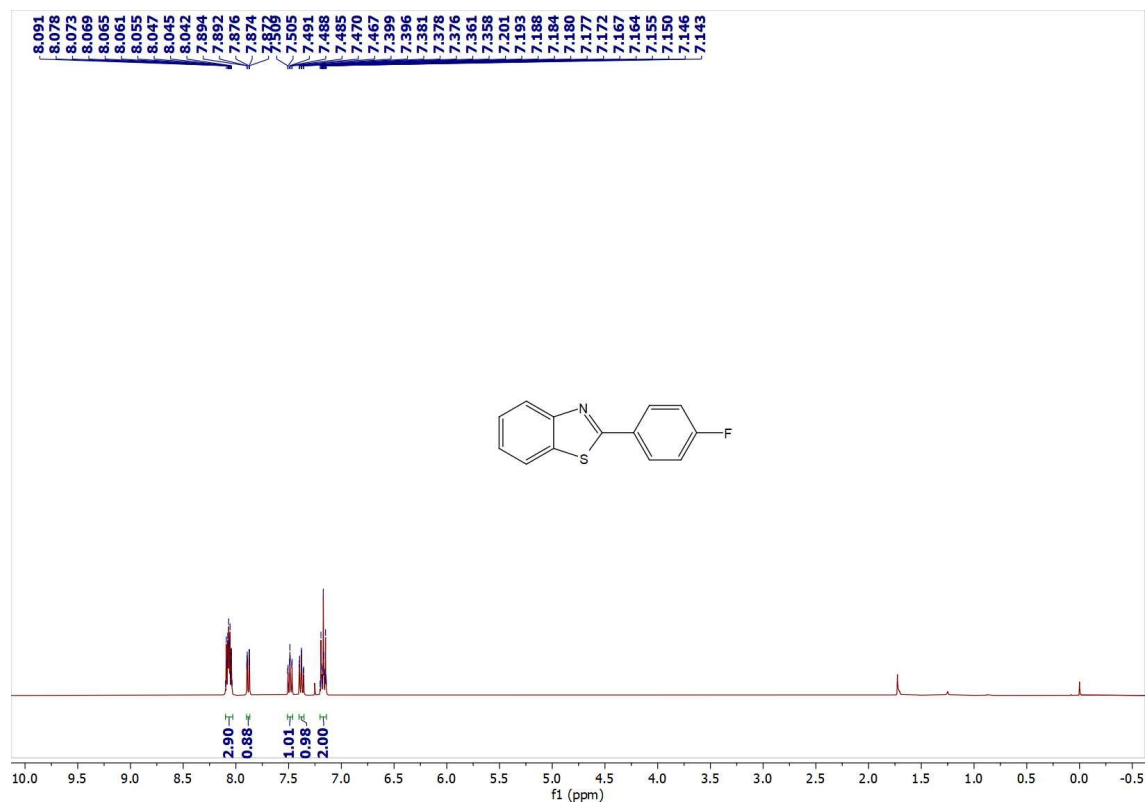

Fig. S20 <sup>1</sup>H-NMR Spectrum of 6g



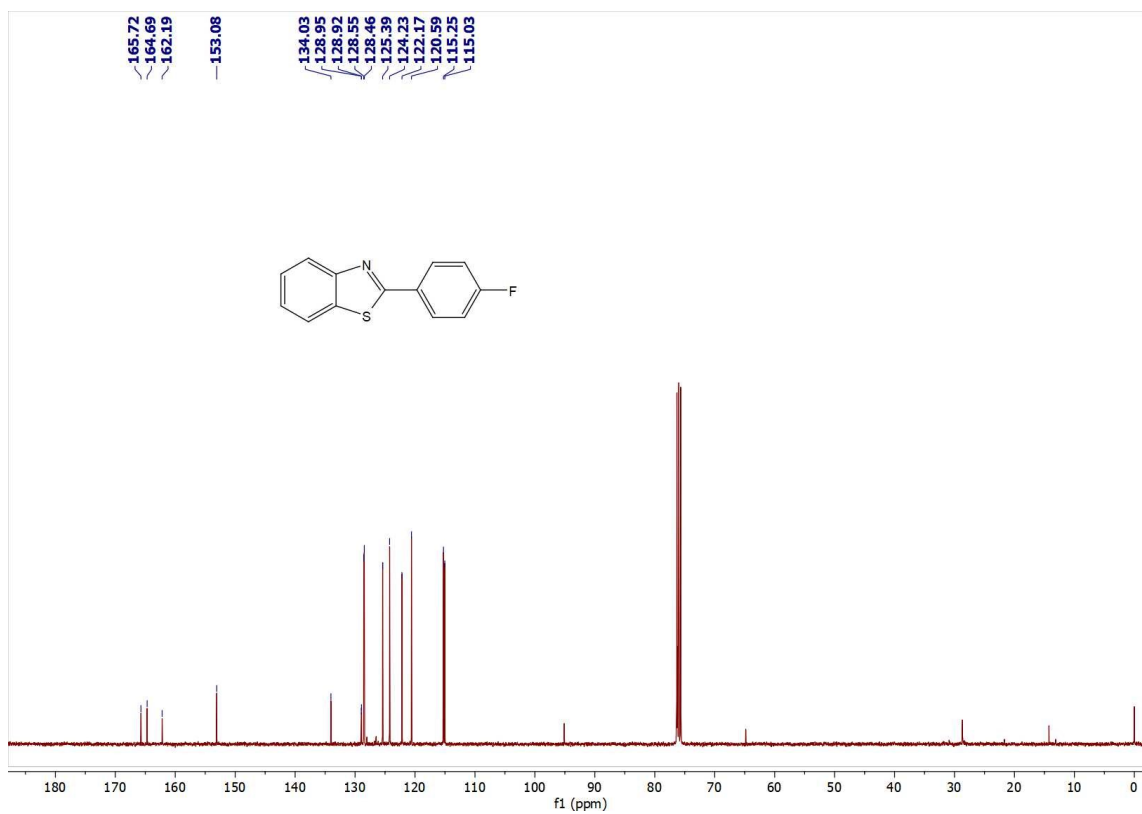

**Fig. S21** <sup>13</sup>C{<sup>1</sup>H}-NMR Spectrum of **6g**

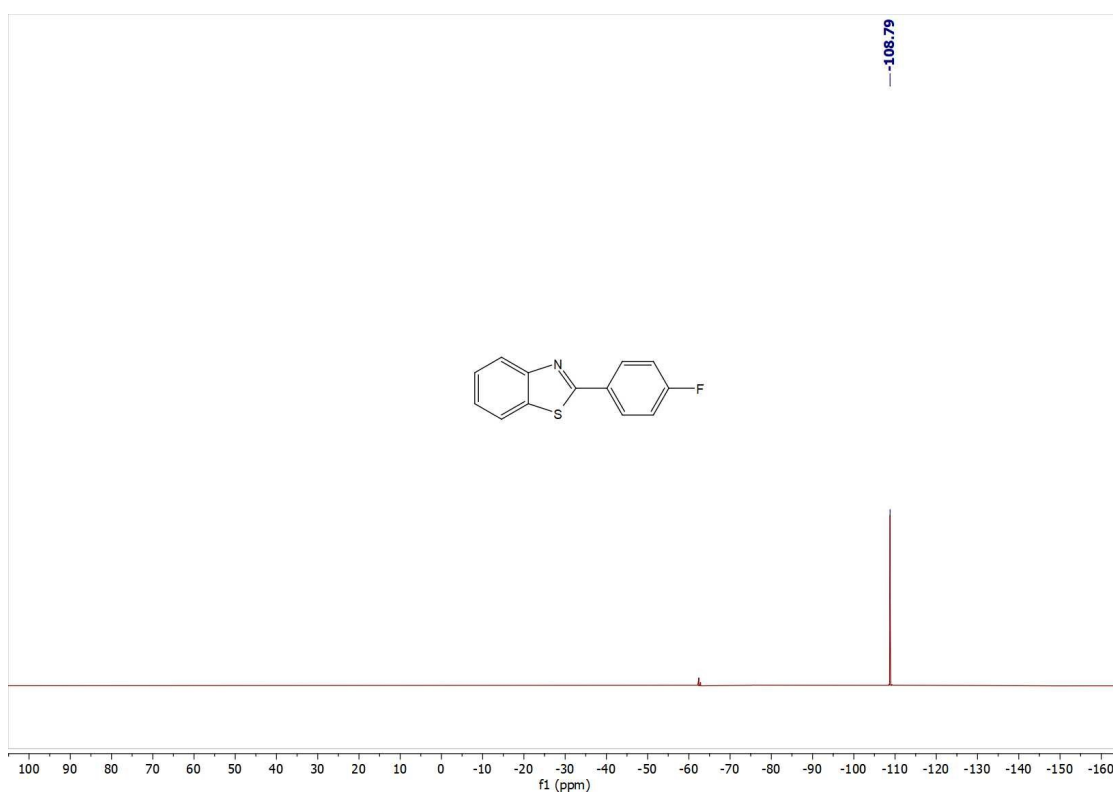

**Fig. S22** <sup>19</sup>F-NMR Spectrum of **6g**

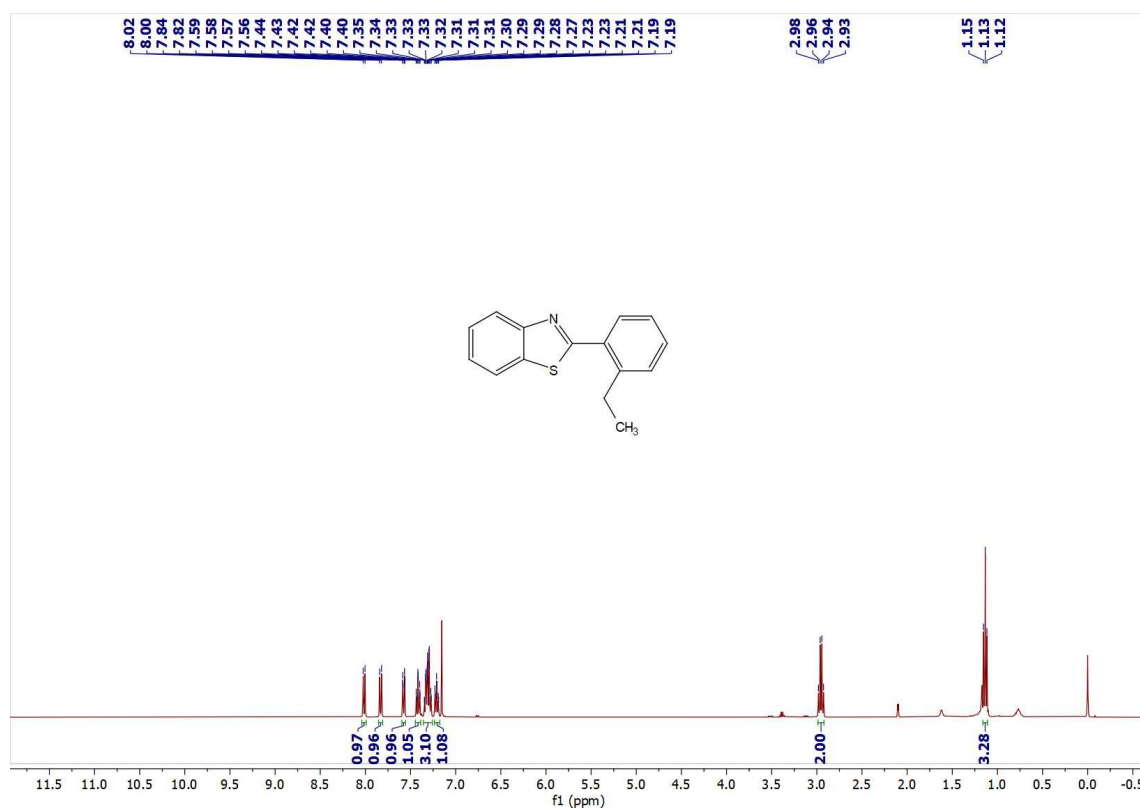

**Fig. S23** <sup>1</sup>H-NMR Spectrum of **6h**

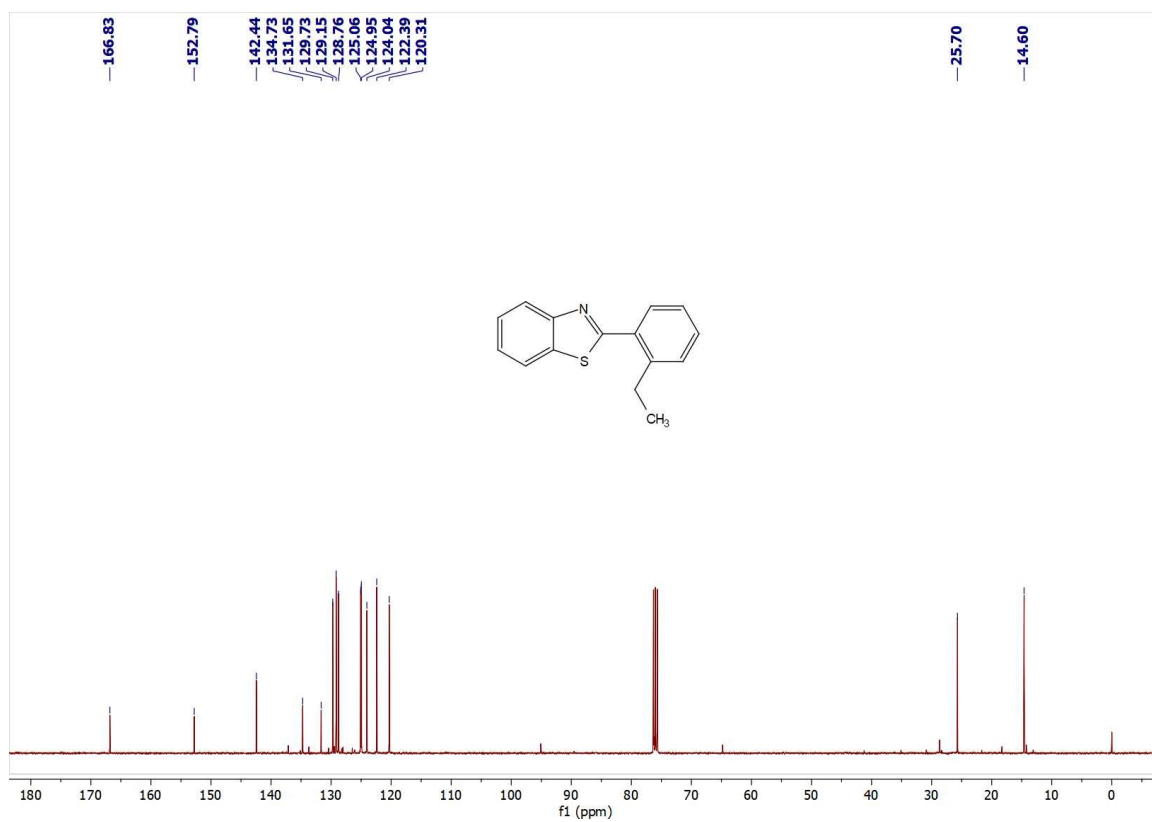

**Fig. S24** <sup>13</sup>C{<sup>1</sup>H}-NMR Spectrum of **6h**

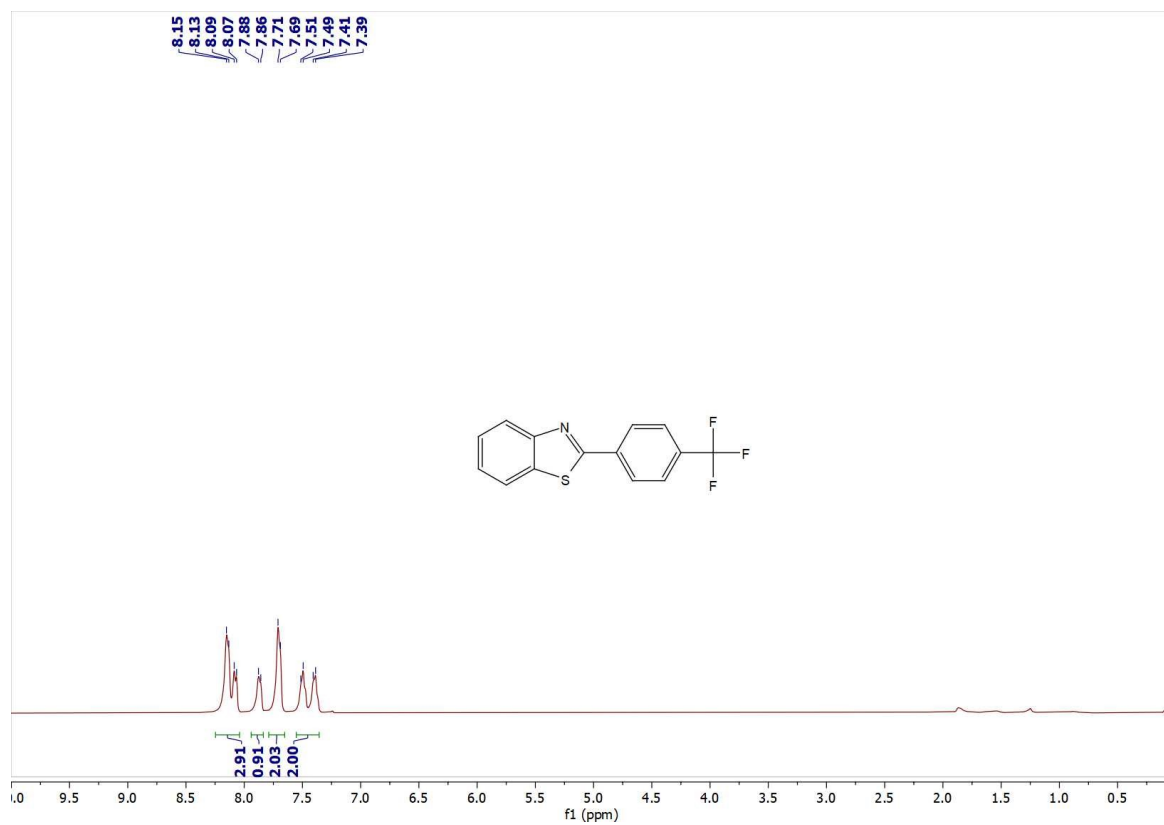

**Fig. S25** <sup>1</sup>H-NMR Spectrum of **6i**

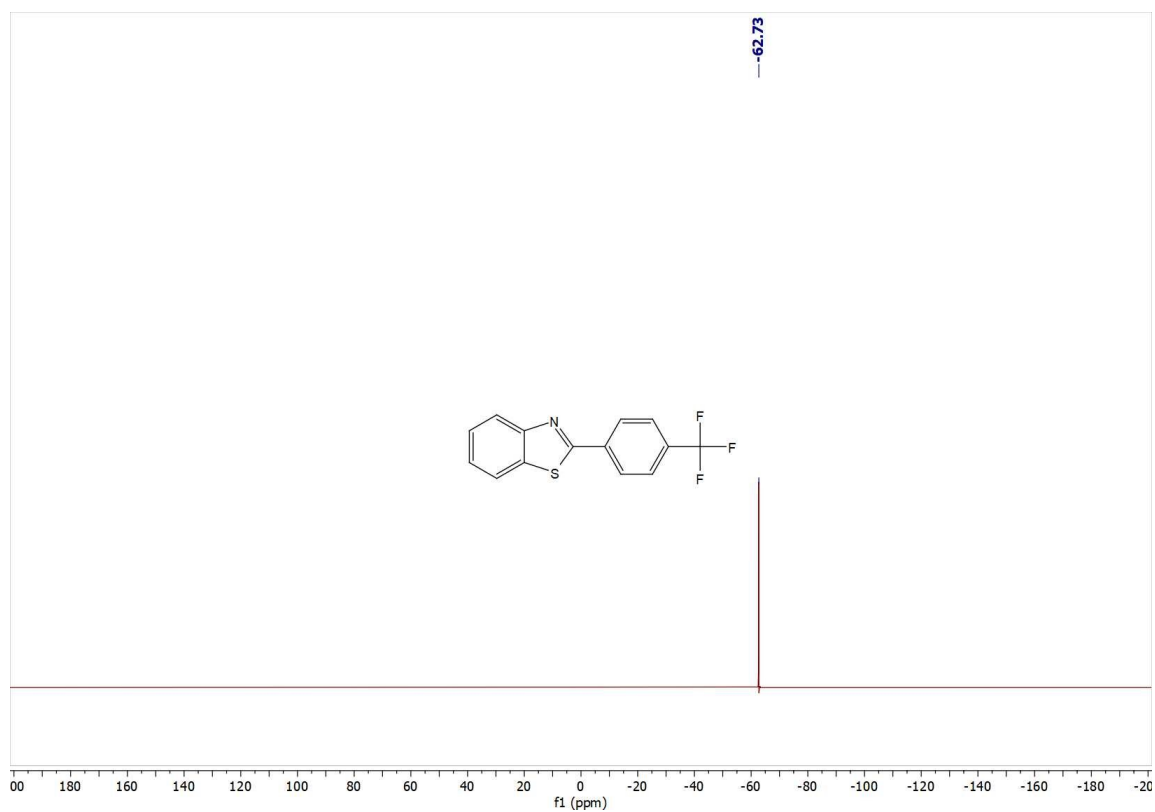

**Fig. S26** <sup>19</sup>F-NMR Spectrum of **6i**

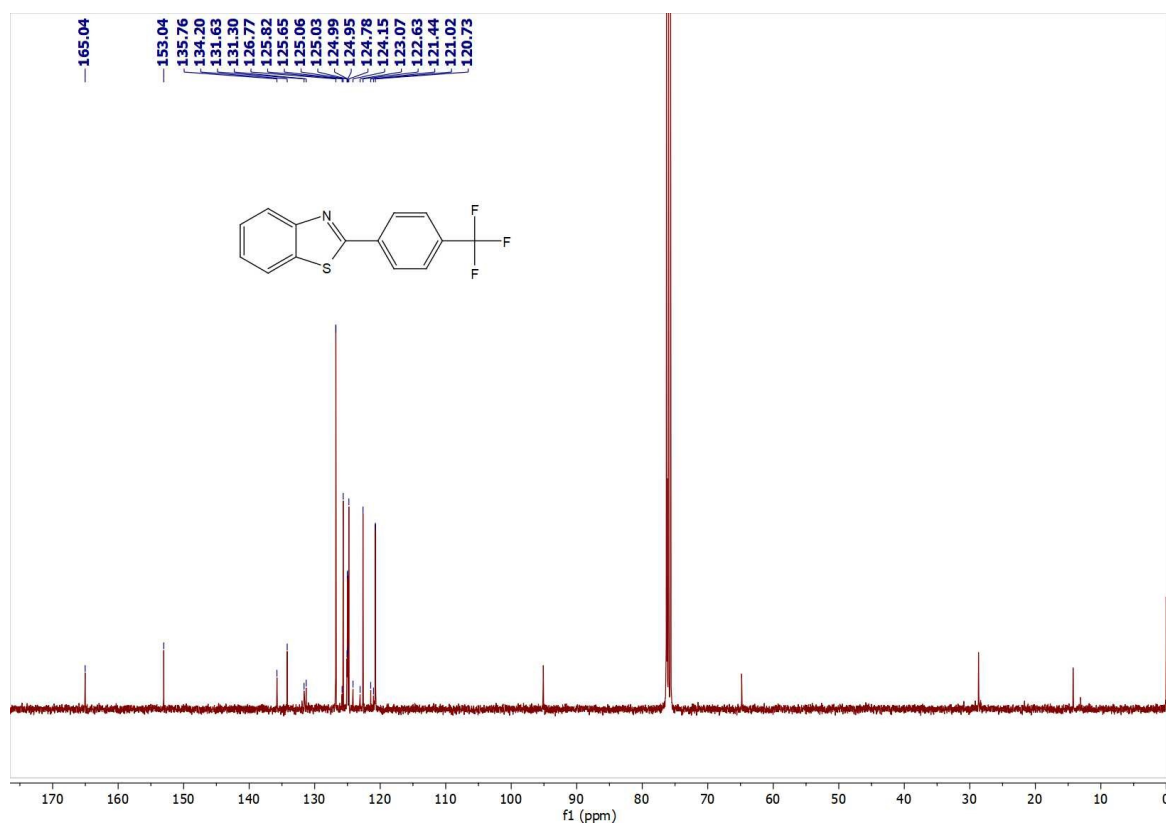

Fig. S27  $^{13}\text{C}\{^1\text{H}\}$ -NMR Spectrum of **6i**

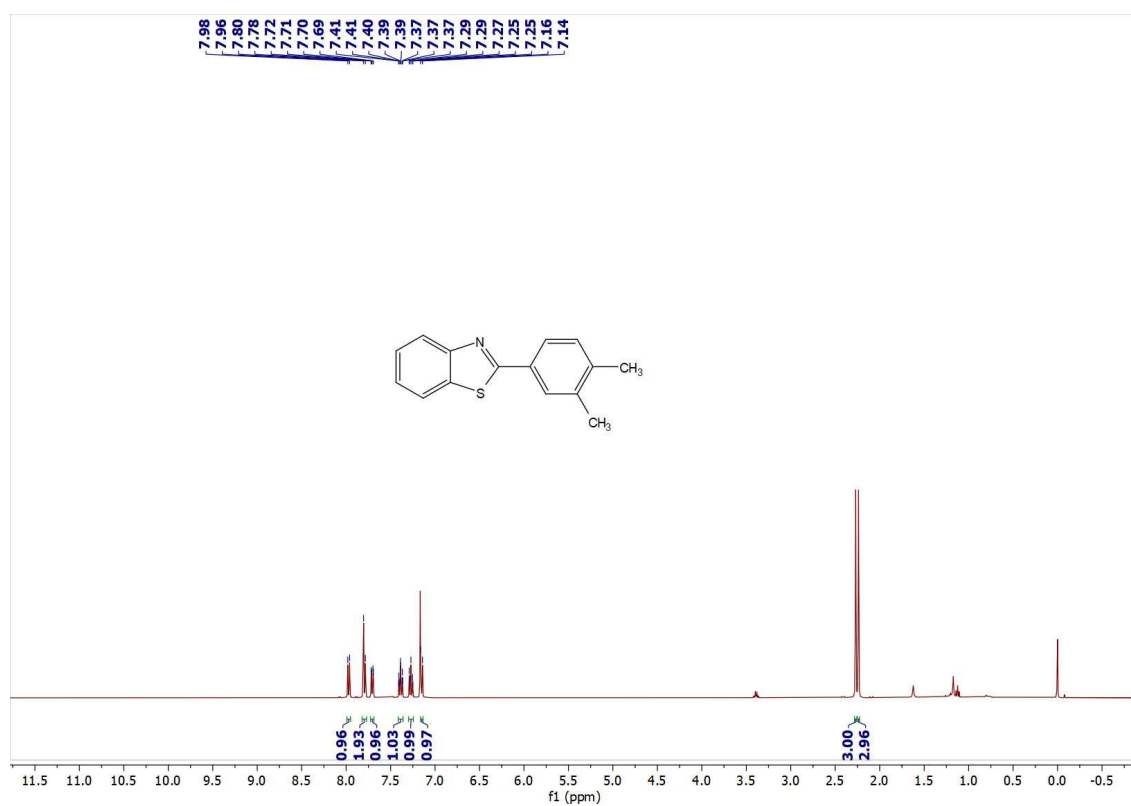

Fig. S28  $^1\text{H}$ -NMR Spectrum of **6j**

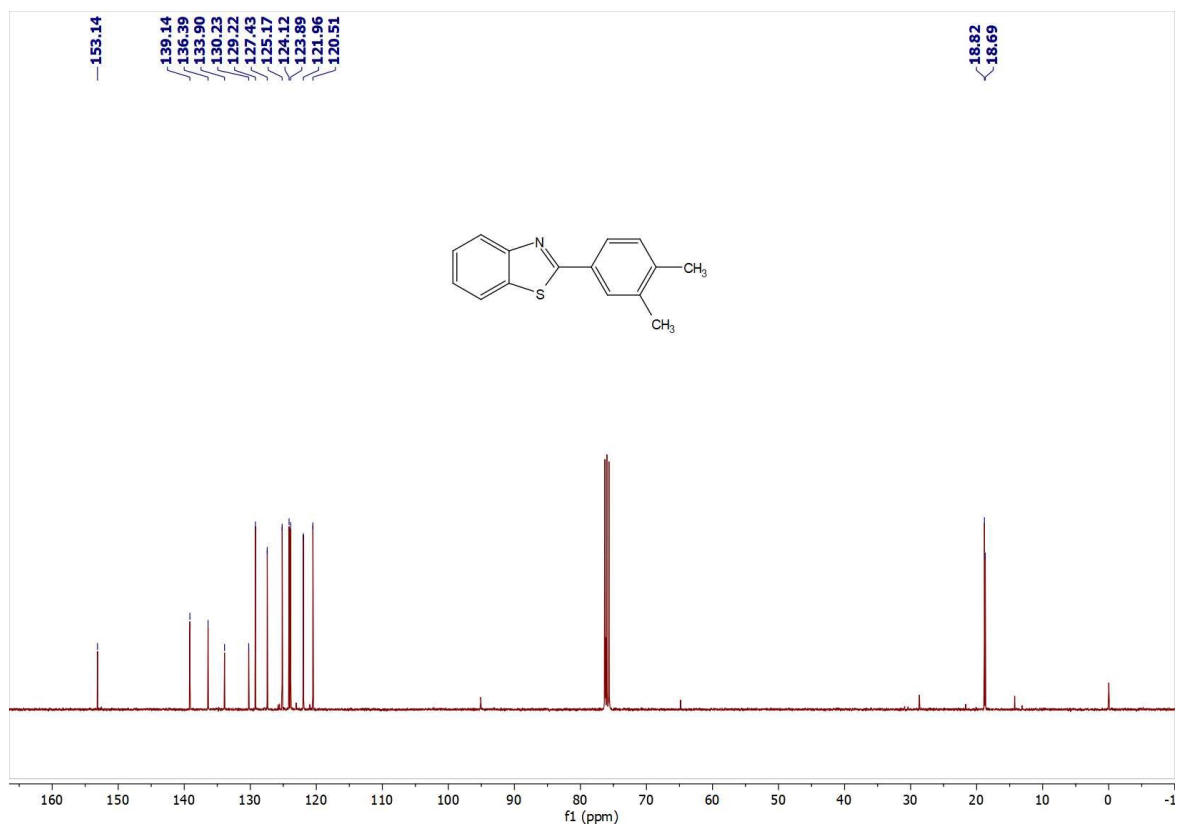

Fig. S29 <sup>13</sup>C{<sup>1</sup>H}-NMR Spectrum of **6j**

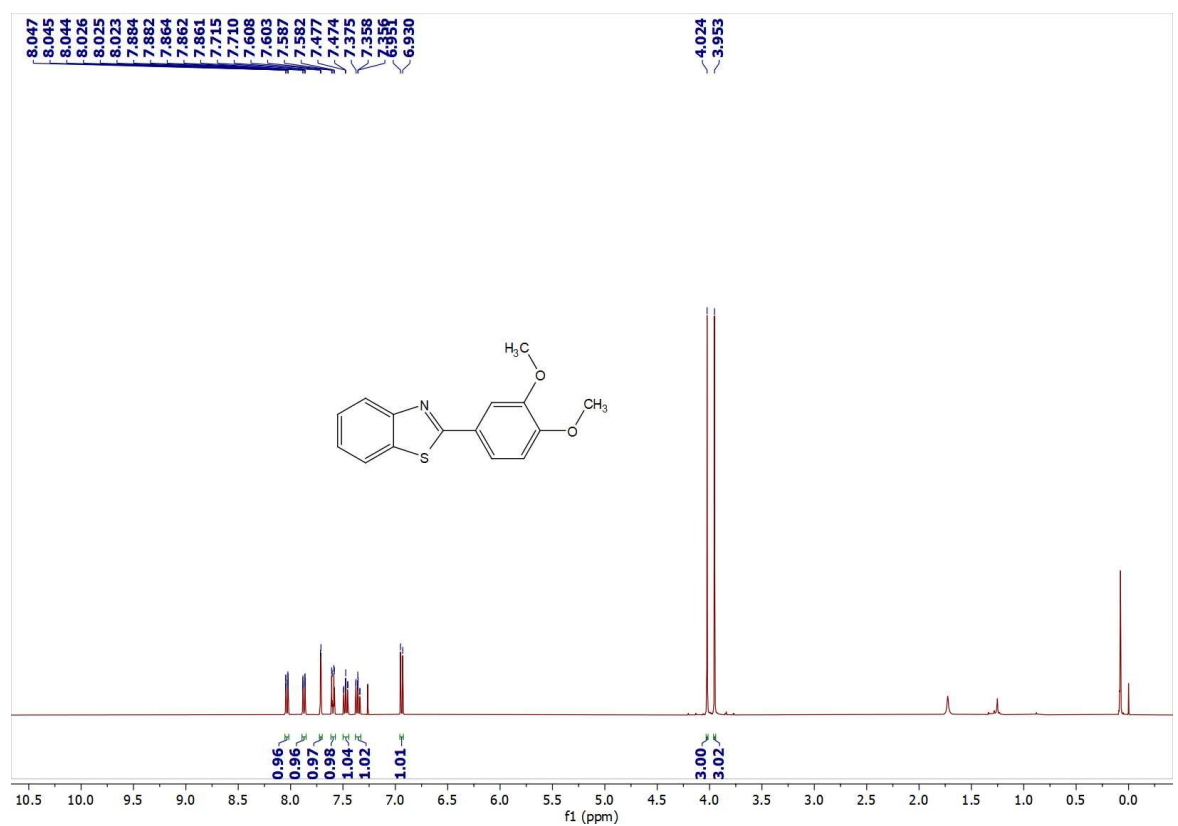

Fig. S30 <sup>1</sup>H-NMR Spectrum of **6l**

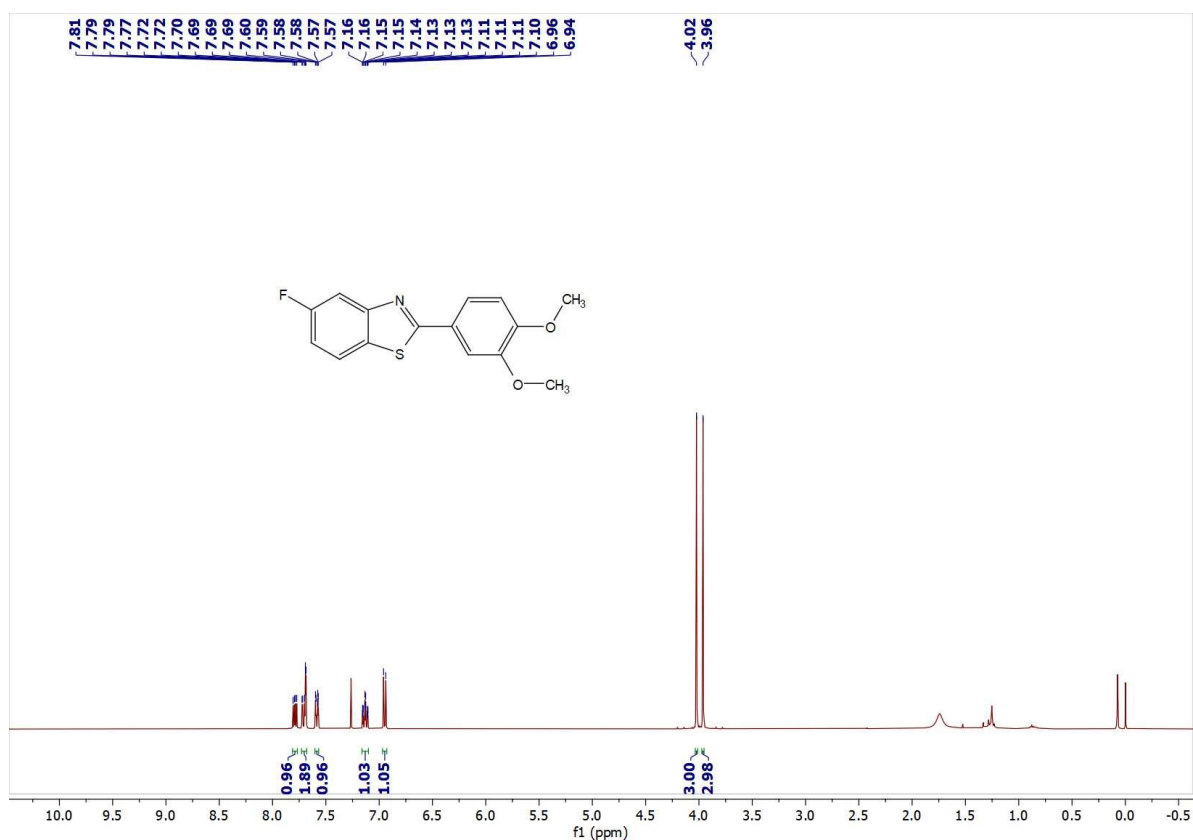

Fig. S31 <sup>1</sup>H-NMR Spectrum of 6m

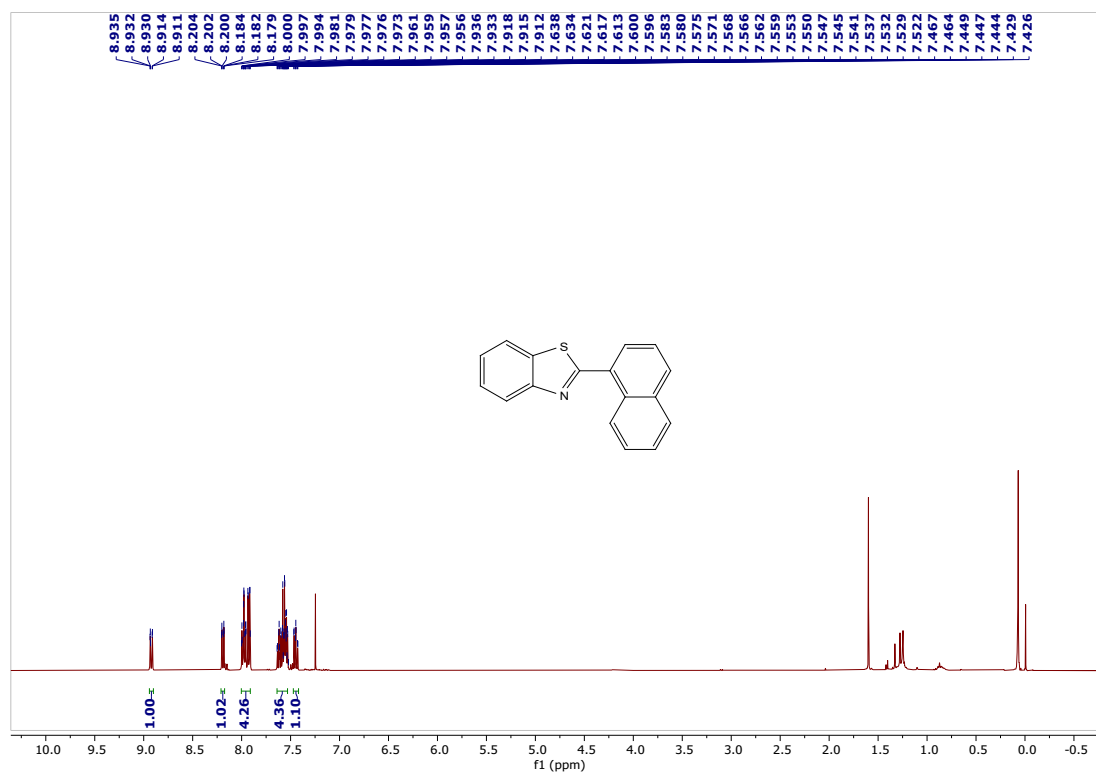

Fig. S32 <sup>1</sup>H-NMR Spectrum of 6n

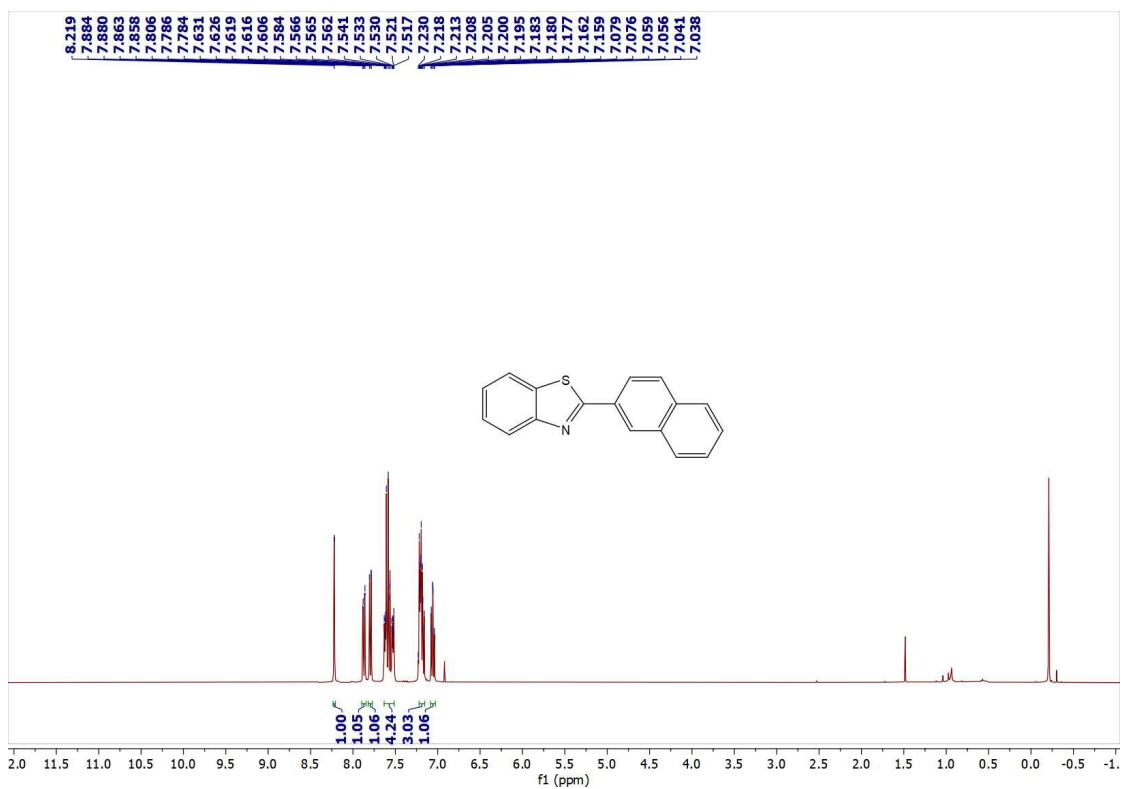

**Fig. S33**  $^1\text{H}$ -NMR Spectrum of **60**

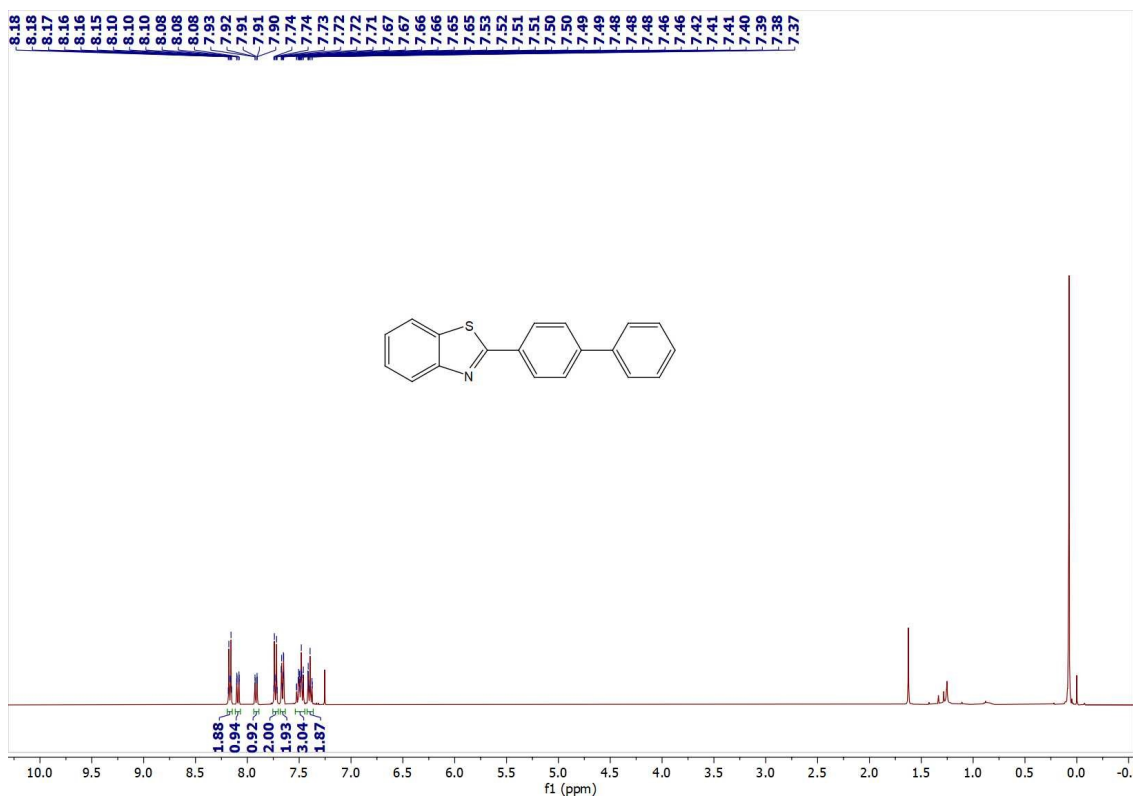

**Fig. S34**  $^1\text{H}$ -NMR Spectrum of **6p**

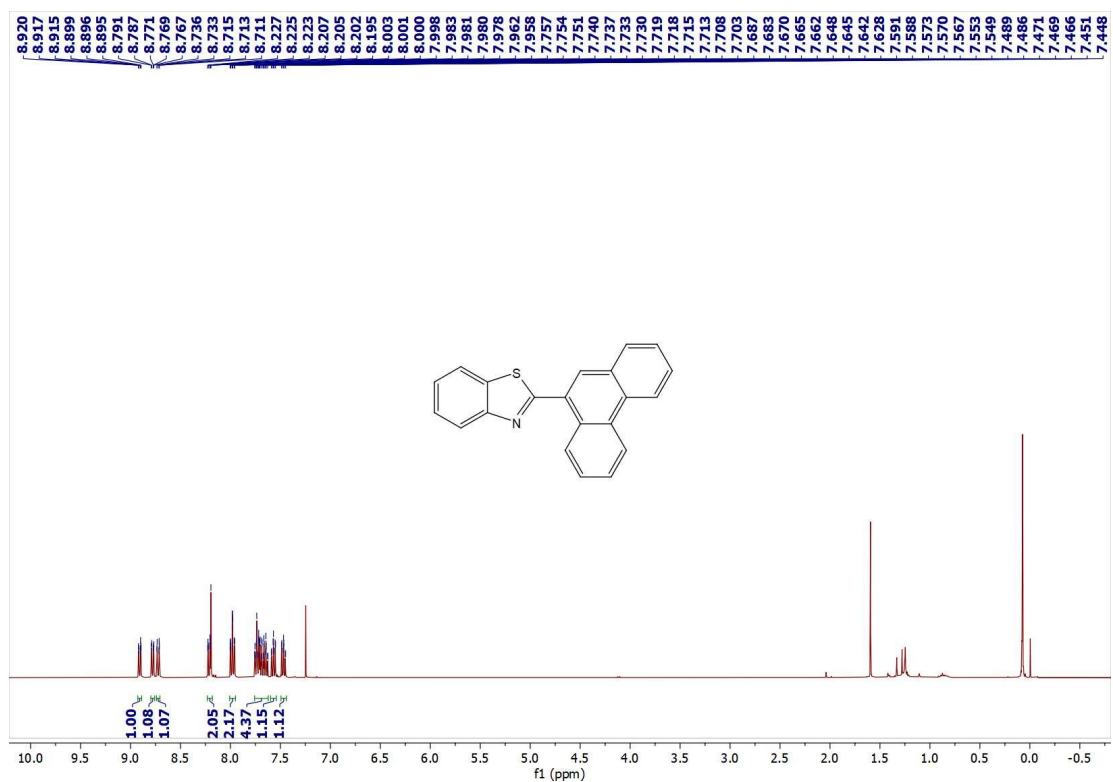

Fig. S35 <sup>1</sup>H-NMR Spectrum of 6q

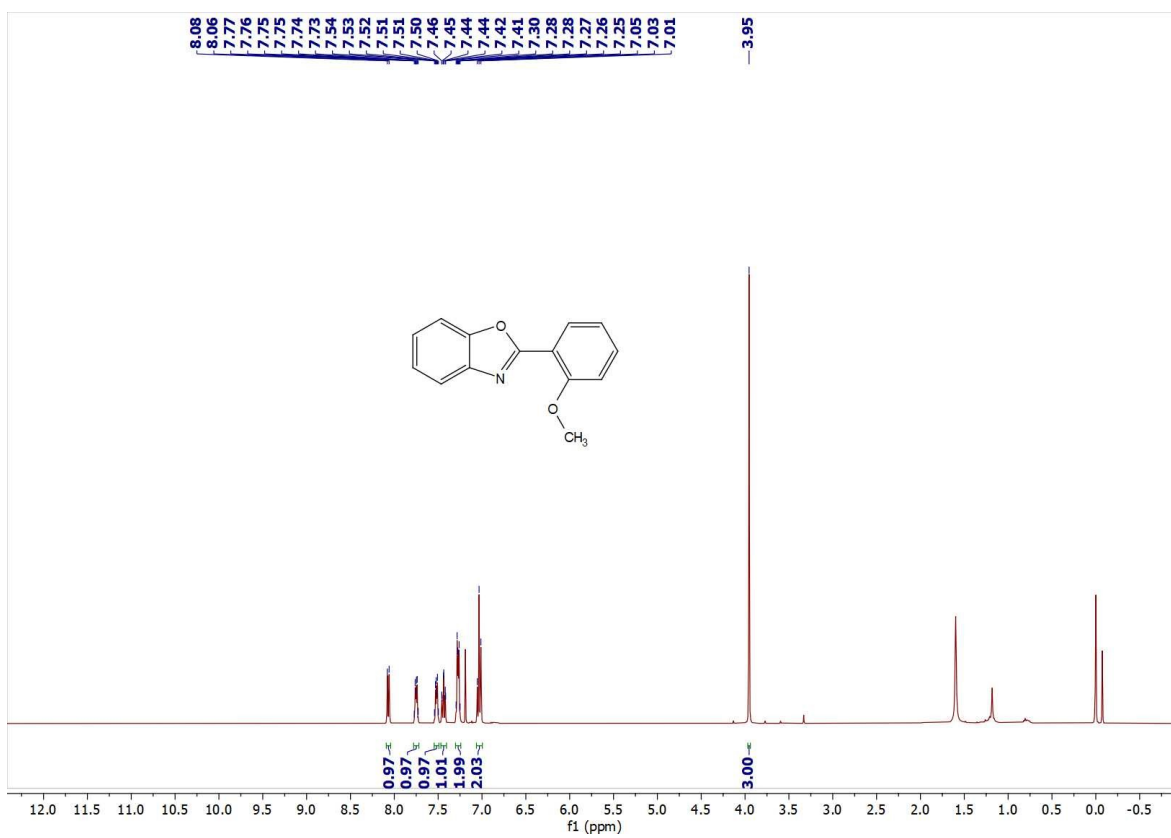

Fig. S36 <sup>1</sup>H-NMR Spectrum of 6r



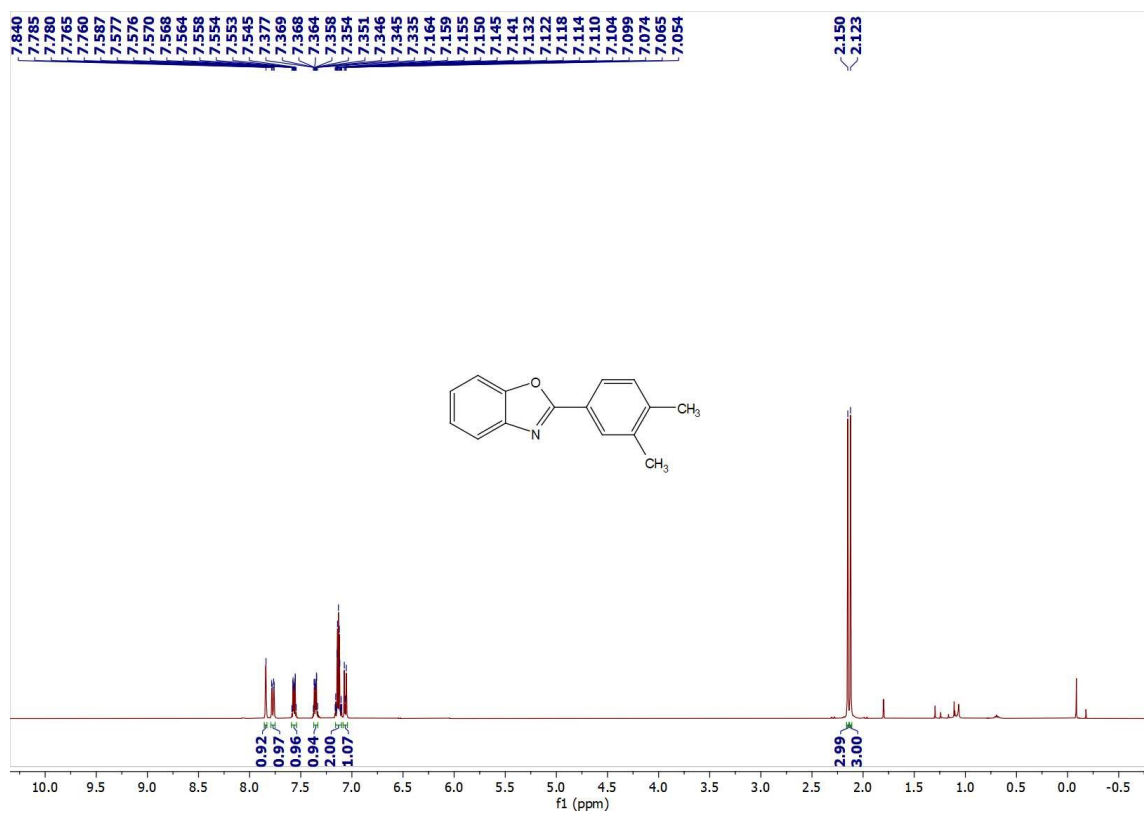

**Fig. S37 <sup>1</sup>H-NMR Spectrum of 6s**

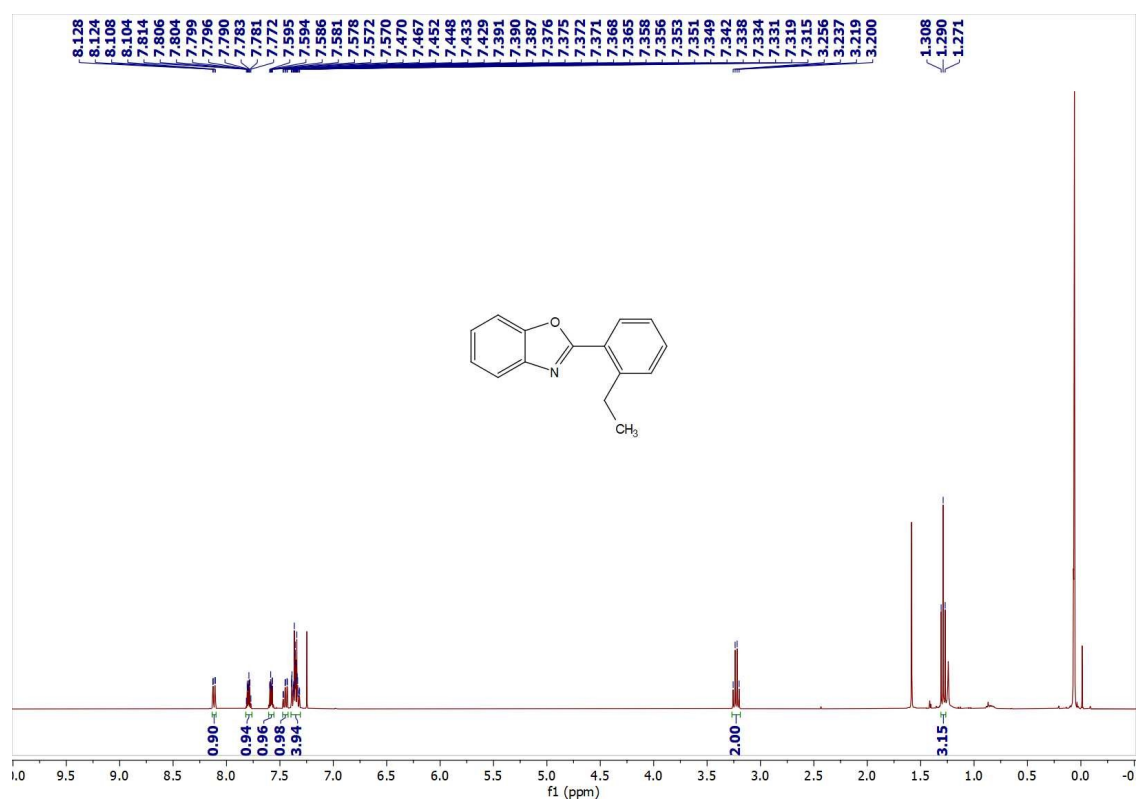

**Fig. S38 <sup>1</sup>H-NMR Spectrum of 6t**

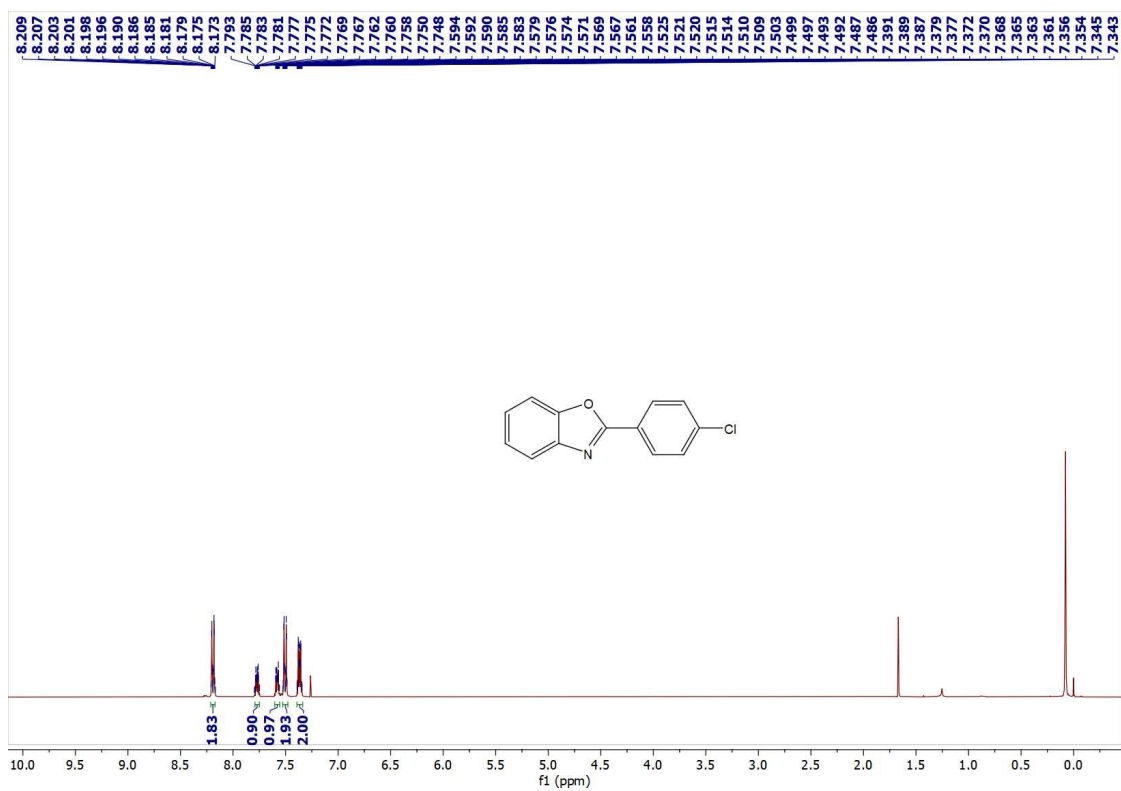

Fig. S39 <sup>1</sup>H-NMR Spectrum of 6u

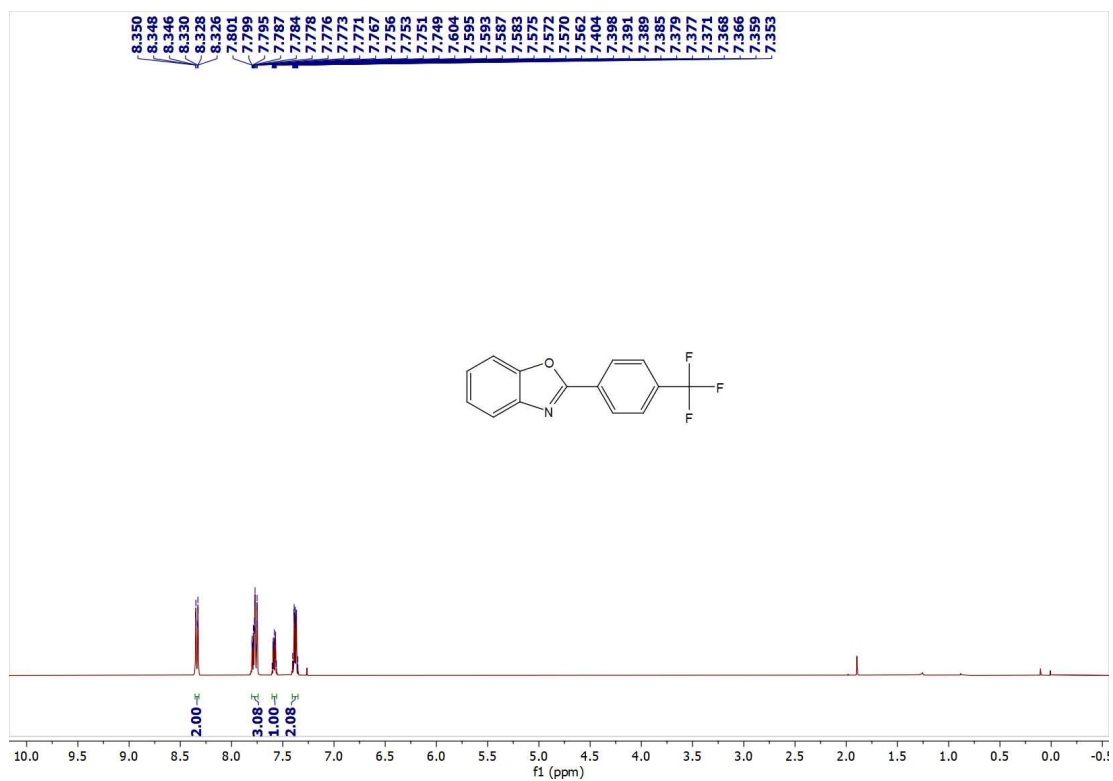

Fig. S40 <sup>1</sup>H-NMR Spectrum of 6v

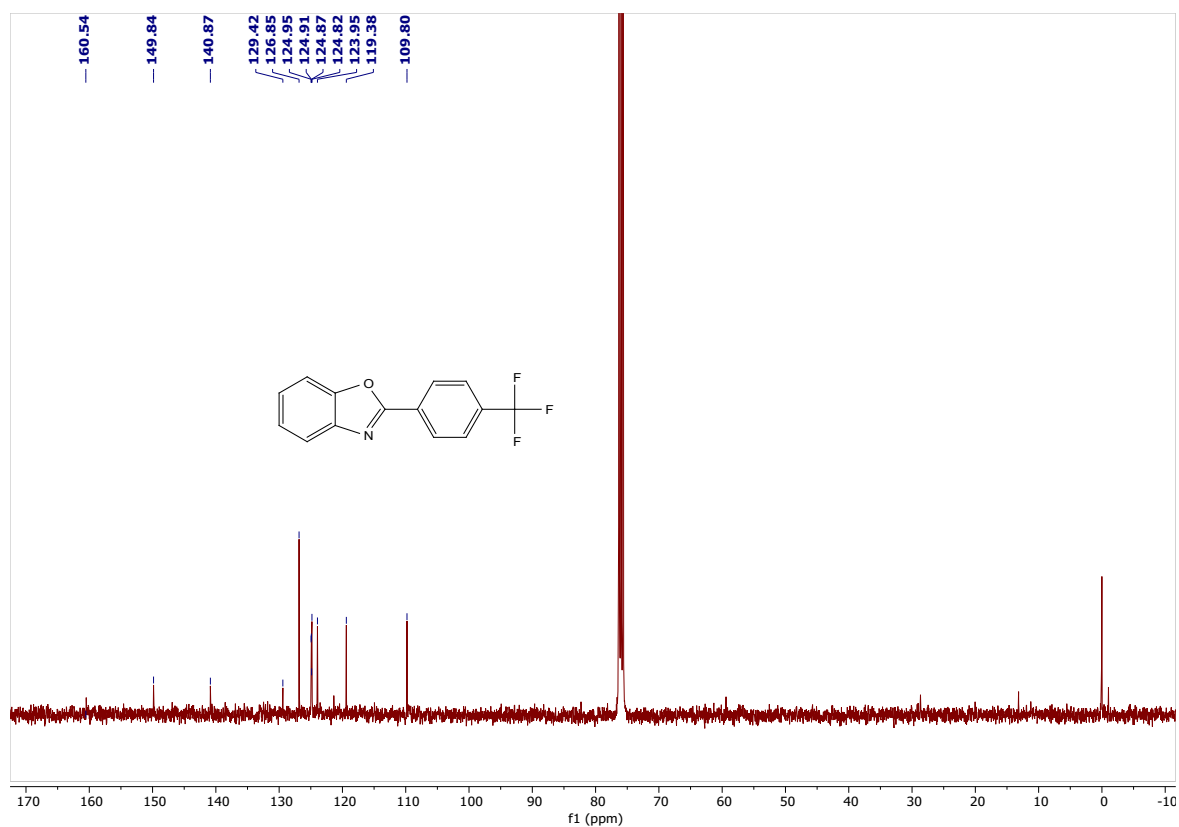

**Fig. S41** <sup>13</sup>C{<sup>1</sup>H}-NMR Spectrum of **6v**

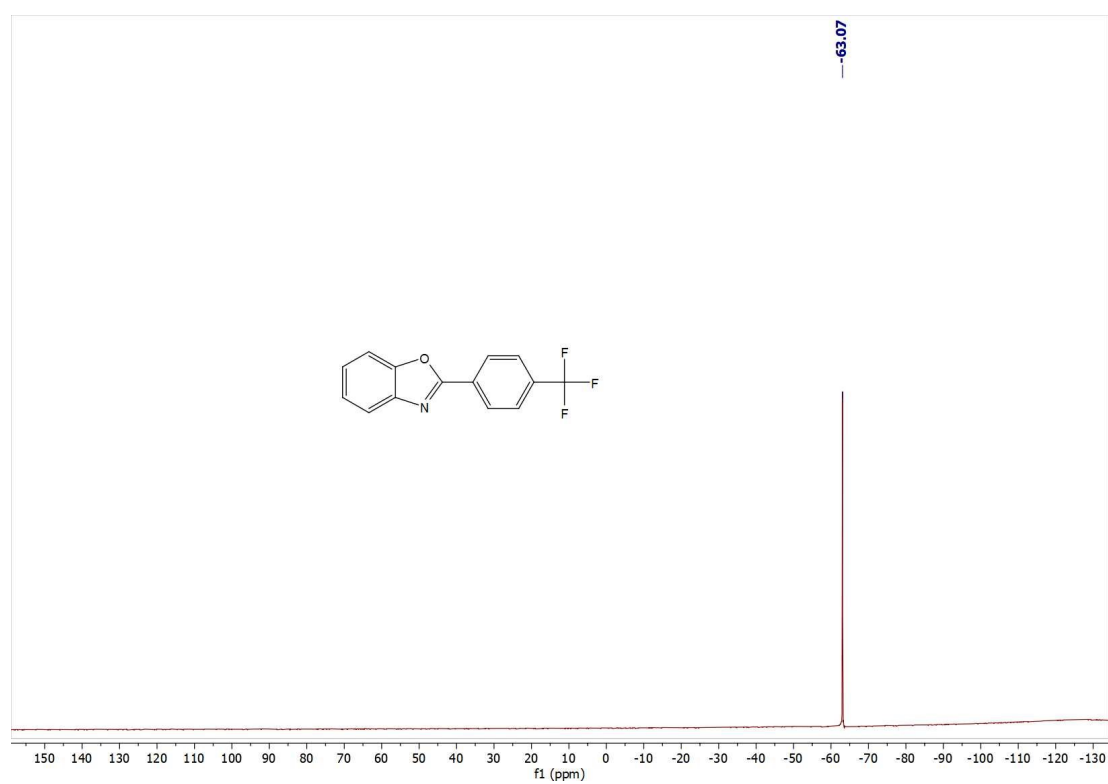

**Fig. S42** <sup>19</sup>F-NMR Spectrum of **6v**

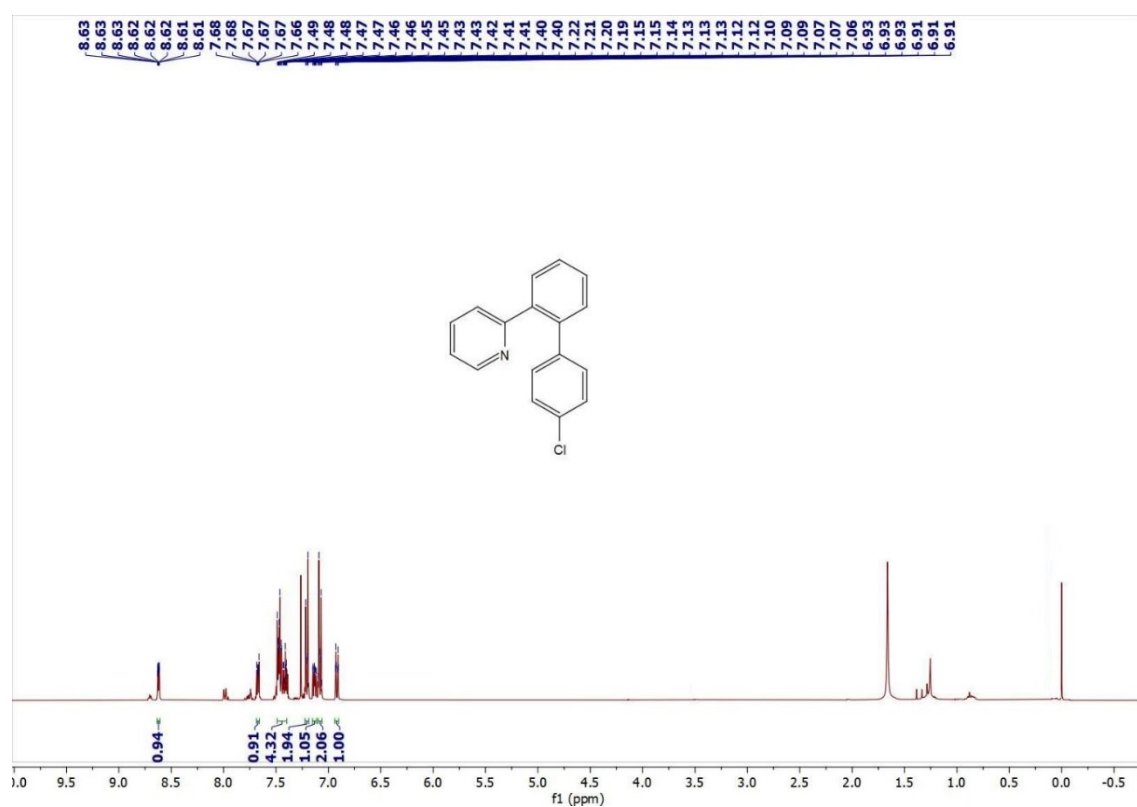

Fig. S43 <sup>1</sup>H-NMR Spectrum of 9

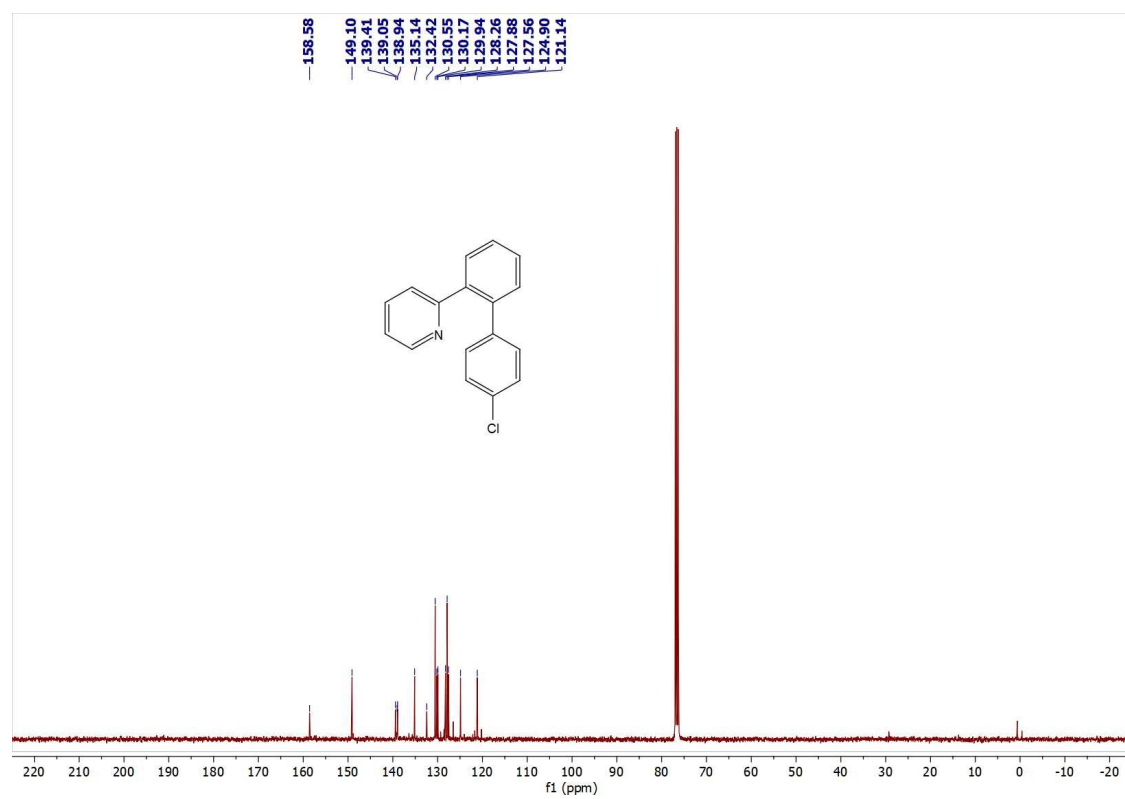

Fig. S44 <sup>13</sup>C-NMR Spectrum of 9

### 13. References:

- 1 P. S. Gahlaut, D. Gautam, P. Lama and B. Jana, *New J. Chem.*, 2023, **47**, 6871–6879.
- 2 G. M. Sheldrick, *Acta Crystallogr. Sect. A Found. Crystallogr.*, 2015, **71**, 3–8.
- 3 G. M. Sheldrick, *Acta Crystallogr. Sect. C Struct. Chem.*, 2015, **71**, 3–8.
- 4 C. R. Groom, I. J. Bruno, M. P. Lightfoot and S. C. Ward, *Acta Crystallogr. Sect. B Struct. Sci. Cryst. Eng. Mater.*, 2016, **72**, 171–179.
- 5 S. Kamijo, T. Jin, Z. Huo and Y. Yamamoto, *J. Am. Chem. Soc.*, 2003, **125**, 7786–7787.
- 6 S. M. Khake, V. Soni, R. G. Gonnade and B. Punji, *Dalt. Trans.*, 2014, **43**, 16084–16096.
- 7 S. Kori, Y. Bhujbal, K. Vadagaonkar, A. R. Kapdi, S. P. Kommyreddy and S. J. Gharpure, *Chem. Commun.*, 2022, **58**, 847–850.
- 8 S. P. Bakare and M. Patil, *European J. Org. Chem.*, 2024, **27**, 1–12.
- 9 W. J. Li, Y. X. Chen, S. L. Kang, L. P. Mo and Z. H. Zhang, *Chem. - A Eur. J.*, 2023, **29**, 1–10.
- 10 W. Song, M. H. Tse, Y. K. Lau, C. W. Cheung, P. Y. Choy and F. Y. Kwong, *Org. Lett.*, 2024, **26**, 10958–10963.
- 11 Z. Yang, X. Chen, S. Wang, J. Liu, K. Xie, A. Wang and Z. Tan, *J. Org. Chem.*, 2012, **77**, 7086–7091.
- 12 A. Nandy and G. Sekar, *J. Org. Chem.*, 2021, **86**, 15825–15834.
- 13 C. Liu, C. L. Ji, T. Zhou, X. Hong and M. Szostak, *Angew. Chemie - Int. Ed.*, 2021, **60**, 10690–10699.
- 14 J. Yang, *Appl. Organomet. Chem.*, 2018, **32**, 1–8.
- 15 Y. X. Chen, L. F. Qian, W. Zhang and B. Han, *Angew. Chemie - Int. Ed.*, 2008, **47**, 9330–9333.
- 16 J. J. Dong, J. Roger, C. Verrier, T. Martin, R. Le Goff, C. Hoarau and H. Doucet, *Green Chem.*, 2010, **12**, 2053–2063.
- 17 L. Su, D. D. Guo, B. Li, S. H. Guo, G. F. Pan, Y. R. Gao and Y. Q. Wang, *ChemCatChem*, 2017, **9**, 2001–2008.
